# Supplementary material
Source: publisher figshare collection journal article supplement (https://acs.figshare.com/ndownloader/files/4345825)
Supplement: Supplementary file 1 [file 4345825]

# Sulfur-Incorporating CTV Analogues: The Synthesis of Cyclotrithioguaiacylene.

Julien Sanseverino,<sup>†</sup> Jean-Claude Chambron,<sup>†\*</sup> Emmanuel Aubert,<sup>‡</sup> and Enrique Espinosa<sup>‡</sup>

<sup>†</sup>*Institut de Chimie Moléculaire de l'Université de Bourgogne (ICMUB, CNRS UMR no. 5260), 9 Avenue Alain Savary, BP 47870, F-21078 Dijon, France, and <sup>‡</sup>CRM2 (CNRS UMR no 7036), Institut Jean Barriol, Faculté des Sciences et Technologies, Nancy-Université, Boulevard des Aiguillettes, BP 70239, F-54506 Vandoeuvre-lès-Nancy, France*

*Jean-Claude.Chambron@u-bourgogne.fr*

## Table of Contents

|                                                                                                                                                           |    |
|-----------------------------------------------------------------------------------------------------------------------------------------------------------|----|
| <b>Experimental Section:</b> General information, synthesis of <b>8</b> , <b>9</b> , and <b>10</b> ; X-ray crystallography of <b>12</b> ; Table S 1. .... | 2  |
| <b>Figure S 1:</b> ORTEP-3 view of <b>12</b> . ....                                                                                                       | 4  |
| <b>Figure S 2:</b> CPK view of <b>12</b> . ....                                                                                                           | 4  |
| <b>Figure S 3:</b> <sup>1</sup> H NMR spectrum of compound <b>3</b> obtained via Newman-Kwart rearrangement. ....                                         | 6  |
| <b>Figure S 4:</b> <sup>1</sup> H NMR spectrum of compound <b>3</b> obtained from <b>6</b> . ....                                                         | 7  |
| <b>Figure S 5:</b> <sup>1</sup> H NMR spectrum of compound <b>1</b> . ....                                                                                | 8  |
| <b>Figure S 6:</b> <sup>13</sup> C NMR spectrum of compound <b>1</b> . ....                                                                               | 9  |
| <b>Figure S 7:</b> <sup>1</sup> H NMR spectrum of compound <b>2</b> . ....                                                                                | 10 |
| <b>Figure S 8:</b> <sup>13</sup> C NMR spectrum of compound <b>2</b> . ....                                                                               | 11 |
| <b>Figure S 9:</b> <sup>1</sup> H NMR spectrum of compound <b>3</b> . ....                                                                                | 12 |
| <b>Figure S 10:</b> <sup>13</sup> C NMR spectrum of compound <b>3</b> . ....                                                                              | 13 |
| <b>Figure S 11:</b> <sup>1</sup> H NMR spectrum of compound <b>4</b> . ....                                                                               | 14 |
| <b>Figure S 12:</b> <sup>13</sup> C NMR spectrum of compound <b>4</b> . ....                                                                              | 15 |
| <b>Figure S 13:</b> <sup>1</sup> H NMR spectrum of compound <b>5</b> . ....                                                                               | 16 |
| <b>Figure S 14:</b> <sup>13</sup> C NMR spectrum of compound <b>5</b> . ....                                                                              | 17 |
| <b>Figure S 15:</b> <sup>1</sup> H NMR spectrum of compound <b>6</b> . ....                                                                               | 18 |
| <b>Figure S 16:</b> <sup>13</sup> C NMR spectrum of compound <b>6</b> . ....                                                                              | 19 |
| <b>Figure S 17:</b> <sup>1</sup> H NMR spectrum of compound <b>7</b> . ....                                                                               | 20 |
| <b>Figure S 18:</b> <sup>13</sup> C NMR spectrum of compound <b>7</b> . ....                                                                              | 21 |
| <b>Figure S 19:</b> <sup>1</sup> H NMR spectrum of compound <b>8</b> . ....                                                                               | 22 |
| <b>Figure S 20:</b> <sup>13</sup> C NMR spectrum of compound <b>8</b> . ....                                                                              | 23 |
| <b>Figure S 21:</b> <sup>1</sup> H NMR spectrum of compound <b>9</b> . ....                                                                               | 24 |
| <b>Figure S 22:</b> <sup>13</sup> C NMR spectrum of compound <b>9</b> . ....                                                                              | 25 |
| <b>Figure S 23:</b> <sup>1</sup> H NMR spectrum of compound <b>10</b> . ....                                                                              | 26 |
| <b>Figure S 24:</b> <sup>13</sup> C NMR spectrum of compound <b>10</b> . ....                                                                             | 27 |
| <b>Figure S 25:</b> <sup>1</sup> H NMR spectrum of compound <b>11</b> . ....                                                                              | 28 |
| <b>Figure S 26:</b> <sup>13</sup> C NMR spectrum of compound <b>11</b> . ....                                                                             | 29 |
| <b>Figure S 27:</b> <sup>1</sup> H NMR spectrum of compound <b>12</b> . ....                                                                              | 30 |
| <b>Figure S 28:</b> <sup>13</sup> C NMR spectrum of compound <b>12</b> . ....                                                                             | 31 |

## Experimental Section.

**General.** **1**,<sup>1</sup> **2**<sup>2</sup> and 4-(*N,N*-dimethylcarbamoylthio)-3-methoxybenzaldehyde (**7**)<sup>2</sup> were prepared according to literature procedures. Unless otherwise stated, all the reactions were run under an inert atmosphere of dinitrogen. CH<sub>2</sub>Cl<sub>2</sub> and THF were distilled from P<sub>2</sub>O<sub>5</sub> and sodium/benzophenone, respectively. <sup>1</sup>H NMR spectra of all new compounds (**3-6**, **8**, **9**, **11** and **12**) were assigned using 2D NOESY experiments, which confirmed that  $\alpha'$ -H (or 5-H) are deshielded by comparison with  $\alpha$ -H (or 2-H and 6-H), and that *ax*-H are deshielded by comparison with *eq*-H.<sup>3</sup> <sup>13</sup>C NMR spectra of all new compounds were assigned using 2D <sup>1</sup>H/<sup>13</sup>C NMR HSQC and HMBC experiments. <sup>1</sup>H and <sup>13</sup>C NMR spectra of **1**<sup>1</sup>, **2**,<sup>2</sup> and **10**<sup>2</sup> were in agreement with literature data.

**4-(*N,N*-dimethylcarbamoylthio)-3-methoxybenzene methanol (**8**).** NaBH<sub>4</sub> (0.250 g, 6.25 mmol) was added to a solution of 4-(*N,N*-dimethylcarbamoylthio)-3-methoxybenzaldehyde **7** (1.00 g, 4.18 mmol) in methanol (60 mL). After 2 hr stirring at room temperature, the reaction mixture was quenched by addition of H<sub>2</sub>O (30 mL) and extracted with dichloromethane (3 × 50 mL). The combined organic layers were dried (MgSO<sub>4</sub>) and filtered. Solvent removal by rotary evaporation followed by drying under vacuum afforded **8** (0.972 g) in 96% yield as a colorless solid. Mp. 129-130 °C; <sup>1</sup>H NMR (300 MHz, CD<sub>3</sub>OD)  $\delta$  3.00 (br s, 3H; NCH<sub>3</sub>), 3.12 (br s, 3H; NCH<sub>3</sub>), 3.86 (s, 3H; OCH<sub>3</sub>), 4.66 (d, <sup>3</sup>*J* = 6.0 Hz, 2H; CH<sub>2</sub>), 6.91 (d, <sup>3</sup>*J* = 7.8 Hz, 1H; 6-H), 6.99 (d, <sup>4</sup>*J* = 1.2 Hz, 1H; 2-H), 7.41 (dd, <sup>3</sup>*J* = 7.8 Hz, <sup>4</sup>*J* = 1.2 Hz, 1H; 5-H) ppm; <sup>13</sup>C NMR (75 MHz, CDCl<sub>3</sub>)  $\delta$  37.1 (NCH<sub>3</sub>), 56.2 (OCH<sub>3</sub>), 65.0 (CH<sub>2</sub>O), 109.9 (2-C), 115.7 (4-C), 119.1 (6-C), 138.2 (5-C), 145.2 (1-C), 160.4 (3-C), 166.6 (CO); IR (ATR)  $\nu$  1639 (SC=O) cm<sup>-1</sup>; Anal. Calcd for C<sub>11</sub>H<sub>15</sub>NO<sub>3</sub>S·1/4H<sub>2</sub>O (249.56): C, 53.8; H, 6.4; N, 5.7. Found: C, 54.0; H, 6.8; N, 5.7%.

**4-(*N,N*-dimethylcarbamoylthio)-3-methoxybenzyl formate (**9**).** A solution of **8** (0.500 g, 2.07 mmol) in formic acid (5 mL) was heated at 70 °C for 24 hr. The solvent was removed under reduced pressure and the solid residue washed with water to afford **9** (0.490 g, 1.82 mmol) in 90% yield. Mp. 93-94 °C; <sup>1</sup>H NMR (300 MHz, CDCl<sub>3</sub>)  $\delta$  2.99 (br s, 3H; NCH<sub>3</sub>), 3.08 (br s, 3H; NCH<sub>3</sub>), 3.85 (s, 3H; OCH<sub>3</sub>), 5.18 (s, 2H; CH<sub>2</sub>), 6.93 (s, 1H; 2-H), 6.95 (d, <sup>3</sup>*J* = 7.5 Hz, 1H; 6-H), 7.43 (d, <sup>3</sup>*J* = 7.5 Hz, 1H; 5-H), 8.12 (s, 1H; CHO) ppm; <sup>13</sup>C NMR (75 MHz, CDCl<sub>3</sub>)  $\delta$  36.9 (N(CH<sub>3</sub>)<sub>2</sub>), 56.1 (OCH<sub>3</sub>), 65.2 (CH<sub>2</sub>), 111.1 (2-C), 117.0 (4-C), 120.5 (6-C), 138.2 (5-C), 138.8 (1-C), 160.1 (3-C), 160.6 (HCO), 165.9 (SCO) ppm; IR (ATR)  $\nu$  1711 (HC=O), 1653 (SC=O) cm<sup>-1</sup>; Anal. Calcd for C<sub>12</sub>H<sub>15</sub>NO<sub>4</sub>S (269.32): C, 53.5; H, 5.6; N, 5.2; S, 11.9. Found: C, 53.6; H, 5.3; N, 5.0; S, 12.4%.

**2,7,12-trihydroxy-3,8,13-trimethylsulfenyl-10,15-dihydro-5H-tribenzo[*a,d,g*]cyclononene (**10**).**<sup>1</sup> *Tert*-butylthiol (0.225 mL, 2.08 mmol) was added to a suspension of NaH (0.050 g, 2.08 mmol) in THF at 0 °C. The mixture was stirred at this temperature for 15 min, then transferred to a solution of **2** (0.100 g, 0.200 mmol) in THF. The resulting reaction mixture was heated at reflux for 12 hr, and quenched by addition of 10% aqueous HCl. The residue was purified by column chromatography (silica gel; CH<sub>2</sub>Cl<sub>2</sub>/CH<sub>3</sub>OH 95:5), which afforded **10** (0.090 g, 0.197 mmol) in 98% yield as a colorless solid.

**Attempted deprotection of **6** to **3**.** Solid AgNO<sub>3</sub> (0.050 g, 0.255 mmol) was added to a solution of **6** (0.050 g, 0.085 mmol) in EtOH (50 mL), and the reaction mixture stirred at room temperature for 2 days. The resulting precipitate was removed by filtration, and the filtrate concentrated to dryness. It was subsequently retaken into CH<sub>2</sub>Cl<sub>2</sub>, and stirred for 6 hr with a 6 N aqueous HCl solution (25 mL). The aqueous layer was extracted with CH<sub>2</sub>Cl<sub>2</sub> and the combined organic layers dried (MgSO<sub>4</sub>) and concentrated to dryness.

**X-ray crystallography of compound 12.** The crystal structure analysis was performed at low temperature ( $T = 110\text{K}$ ) on an Oxford Diffraction X'Calibur CCD diffractometer using  $\text{CuK}\alpha$  radiation ( $\lambda = 1.5418 \text{ \AA}$ ). The structure was solved by direct methods with the program SIR92,<sup>4</sup> and full matrix least-square refinements on  $F^2$  in SHELXL-97<sup>5</sup> were performed with anisotropic displacements for non-H atoms. Hydrogen atoms were located in difference Fourier maps and refined isotropically according to a riding model. CCDC 800716 contains the detailed crystallographic data. These data can be obtained free of charge from the Cambridge Crystallographic Data Centre via [www.ccdc.cam.ac.uk/data\\_request/cif](http://www.ccdc.cam.ac.uk/data_request/cif).

**Table S 1.** Crystal data and structure refinement for **12**.

|                                        |                                                                                              |                                                                          |
|----------------------------------------|----------------------------------------------------------------------------------------------|--------------------------------------------------------------------------|
| Identification code                    | <b>12</b>                                                                                    |                                                                          |
| Empirical formula                      | C <sub>29</sub> H <sub>34</sub> Cl <sub>4</sub> O <sub>9</sub> S <sub>3</sub>                |                                                                          |
| Formula weight                         | 764.54                                                                                       |                                                                          |
| Temperature                            | 110(2) K                                                                                     |                                                                          |
| Wavelength                             | 1.54180 Å                                                                                    |                                                                          |
| Crystal system                         | monoclinic                                                                                   |                                                                          |
| Space group                            | $P 2_1 / c$                                                                                  |                                                                          |
| Unit cell dimensions                   | $a = 16.8059(4) \text{ \AA}$<br>$b = 12.0718(2) \text{ \AA}$<br>$c = 21.4038(5) \text{ \AA}$ | $\alpha = 90^\circ$<br>$\beta = 127.012(3)^\circ$<br>$\gamma = 90^\circ$ |
| Volume                                 | $3467.4(2) \text{ \AA}^3$                                                                    |                                                                          |
| Z                                      | 4                                                                                            |                                                                          |
| Density (calculated)                   | $1.465 \text{ Mg/m}^3$                                                                       |                                                                          |
| Absorption coefficient                 | $5.244 \text{ mm}^{-1}$                                                                      |                                                                          |
| F(000)                                 | 1584                                                                                         |                                                                          |
| Crystal size                           | $0.130 \times 0.089 \times 0.043 \text{ mm}^3$                                               |                                                                          |
| Theta range for data collection        | $3.29$ to $76.39^\circ$                                                                      |                                                                          |
| Index ranges                           | $-21 \leq h \leq 18$ , $-14 \leq k \leq 15$ , $-25 \leq l \leq 26$                           |                                                                          |
| Reflections collected                  | 25730                                                                                        |                                                                          |
| Independent reflections                | 7233 [ $R(\text{int}) = 0.0274$ ]                                                            |                                                                          |
| Completeness to $\theta = 76.39^\circ$ | 99.6 %                                                                                       |                                                                          |
| Refinement method                      | Full-matrix least-squares on $F^2$                                                           |                                                                          |
| Data / restraints / parameters         | 7233 / 0 / 412                                                                               |                                                                          |
| Goodness-of-fit on $F^2$               | 1.045                                                                                        |                                                                          |
| Final R indices [ $I > 2\sigma(I)$ ]   | $R1 = 0.0426$ , $wR2 = 0.1102$                                                               |                                                                          |
| R indices (all data)                   | $R1 = 0.0546$ , $wR2 = 0.1147$                                                               |                                                                          |
| Largest diff. peak and hole            | $1.192$ and $-0.598 \text{ e.\AA}^{-3}$                                                      |                                                                          |

## References.

- (1) a) Collet, A.; Gabard, J. *J. Org. Chem.* **1980**, *45*, 5400; b) Canceill, J.; Collet, A.; Gottarelli, G. *J. Am. Chem. Soc.* **1984**, *106*, 5997.
- (2) Garcia, C.; Andraud, C.; Collet, A. *Supramol. Chem.* **1992**, *1*, 31.
- (3) Collet, A. *Tetrahedron* **1987**, *43*, 5725.
- (4) Altomare, A.; Cascarano, G.; Giacovazzo, C.; Guagliardi, A. *J. Appl. Crystallogr.* **1993**, *26*, 343.
- (5) Sheldrick, G. M. SHELXL-97, University of Göttingen, Germany, **1997**.

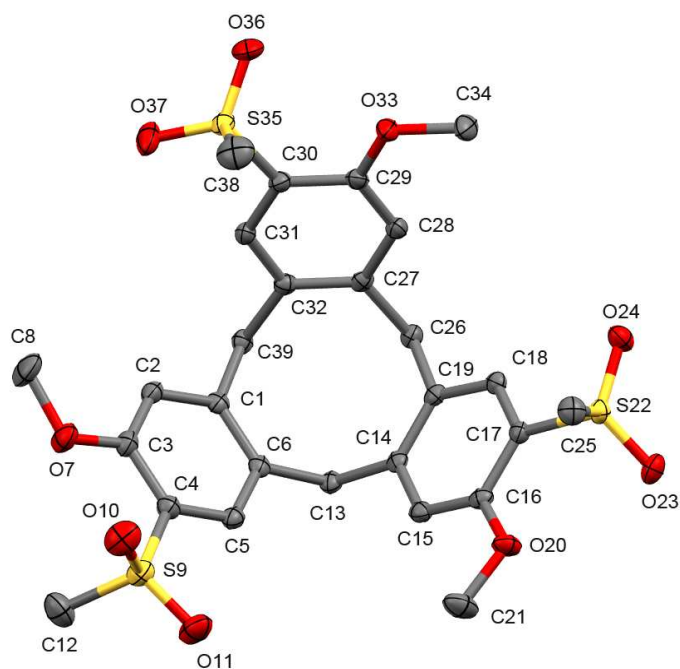

**Figure S 1.** ORTEP-3 view of **12** in space group  $P2_1/c$ . Atomic displacement ellipsoids are plotted at the 50% probability level. Hydrogen atoms and solvent molecules were removed for clarity. The dihedral angles formed by the least square planes of the three phenyl moieties are 66.87(6), 74.78(7)° and 74.05(7)°.

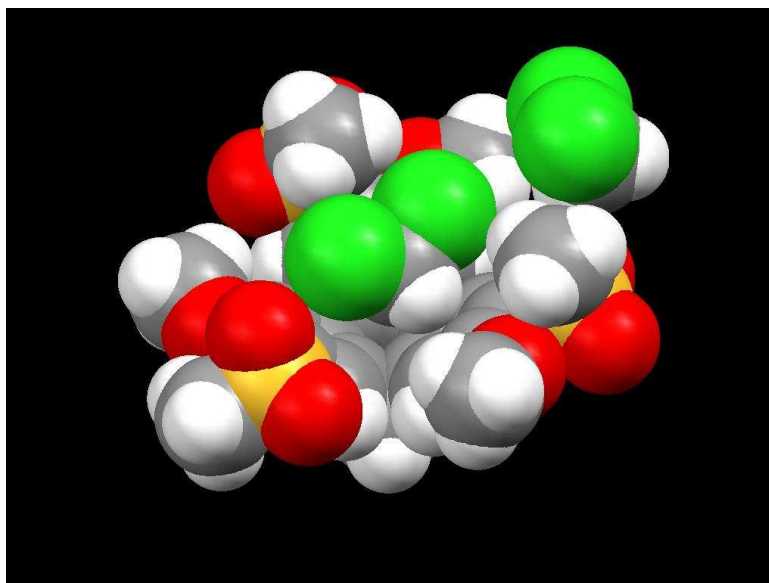

**Figure S 2.** CPK view of **12** with two co-crystallized  $\text{CH}_2\text{Cl}_2$  molecules, one of them trapped within the molecular cavity, showing two edge-to-face aromatic  $\text{CH}\cdots\pi$  interactions (both at 2.81

Å), and weaker CH...Cl (2.97 and 3.21 Å) and Cl...O interactions (3.80 Å) between guest and host.

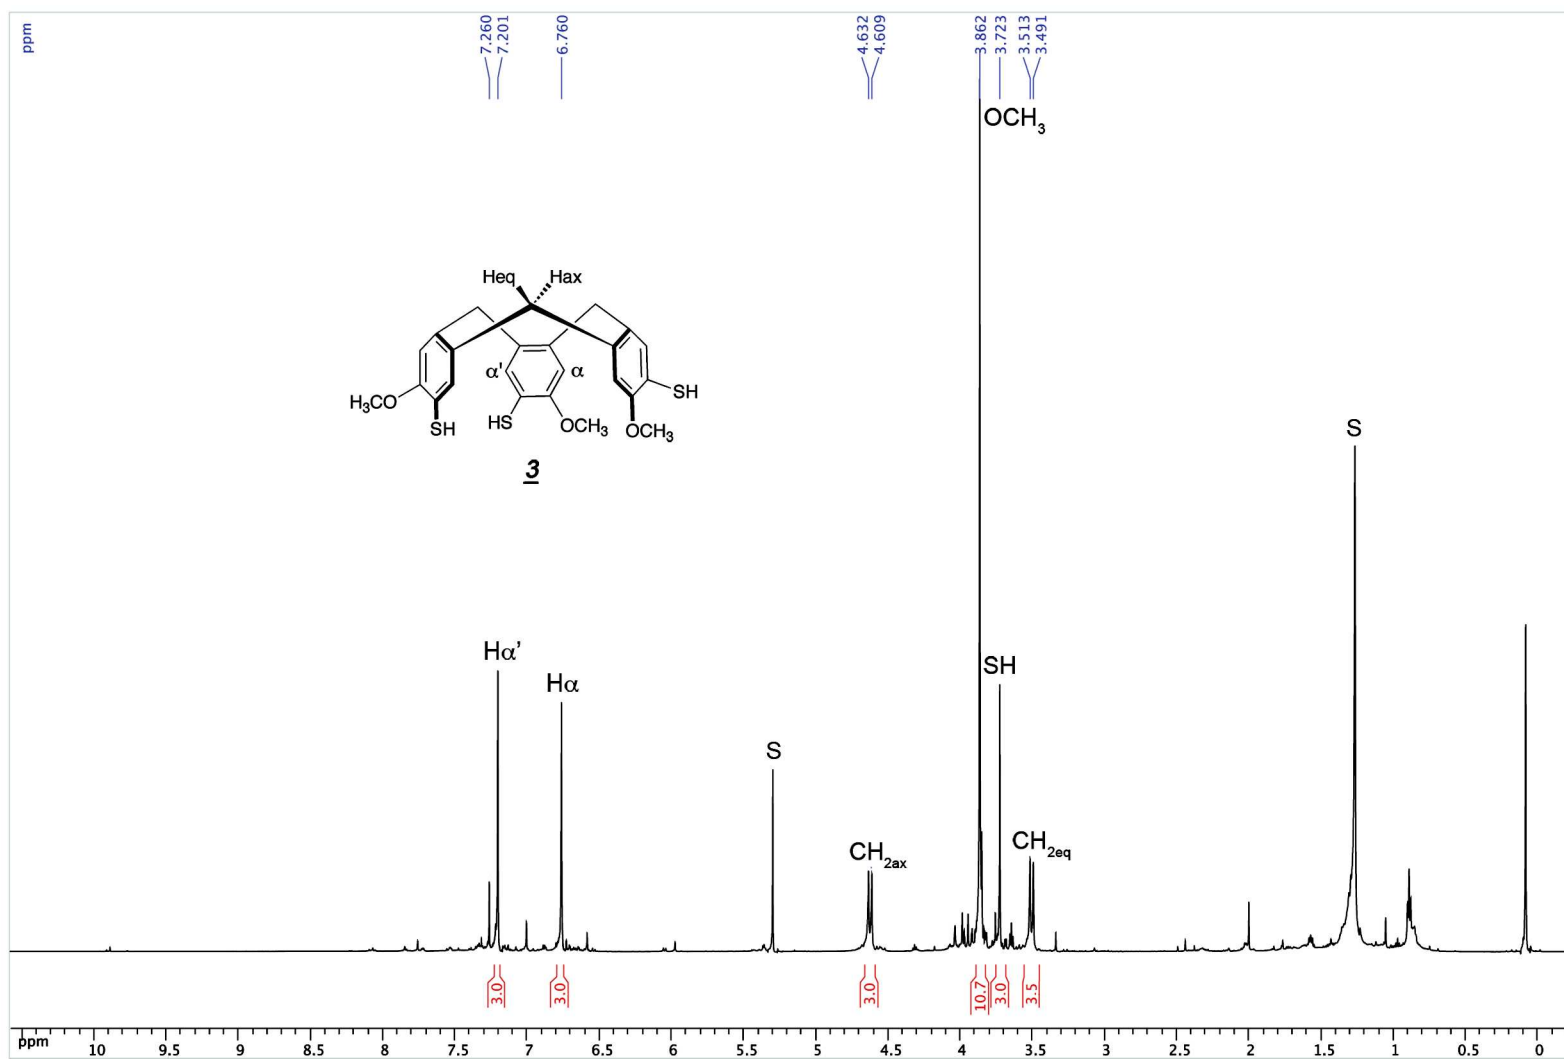

**Figure S 3:** <sup>1</sup>H NMR spectrum of cyclotrithioguaiacylene **3** obtained via Newman-Kwart rearrangement.

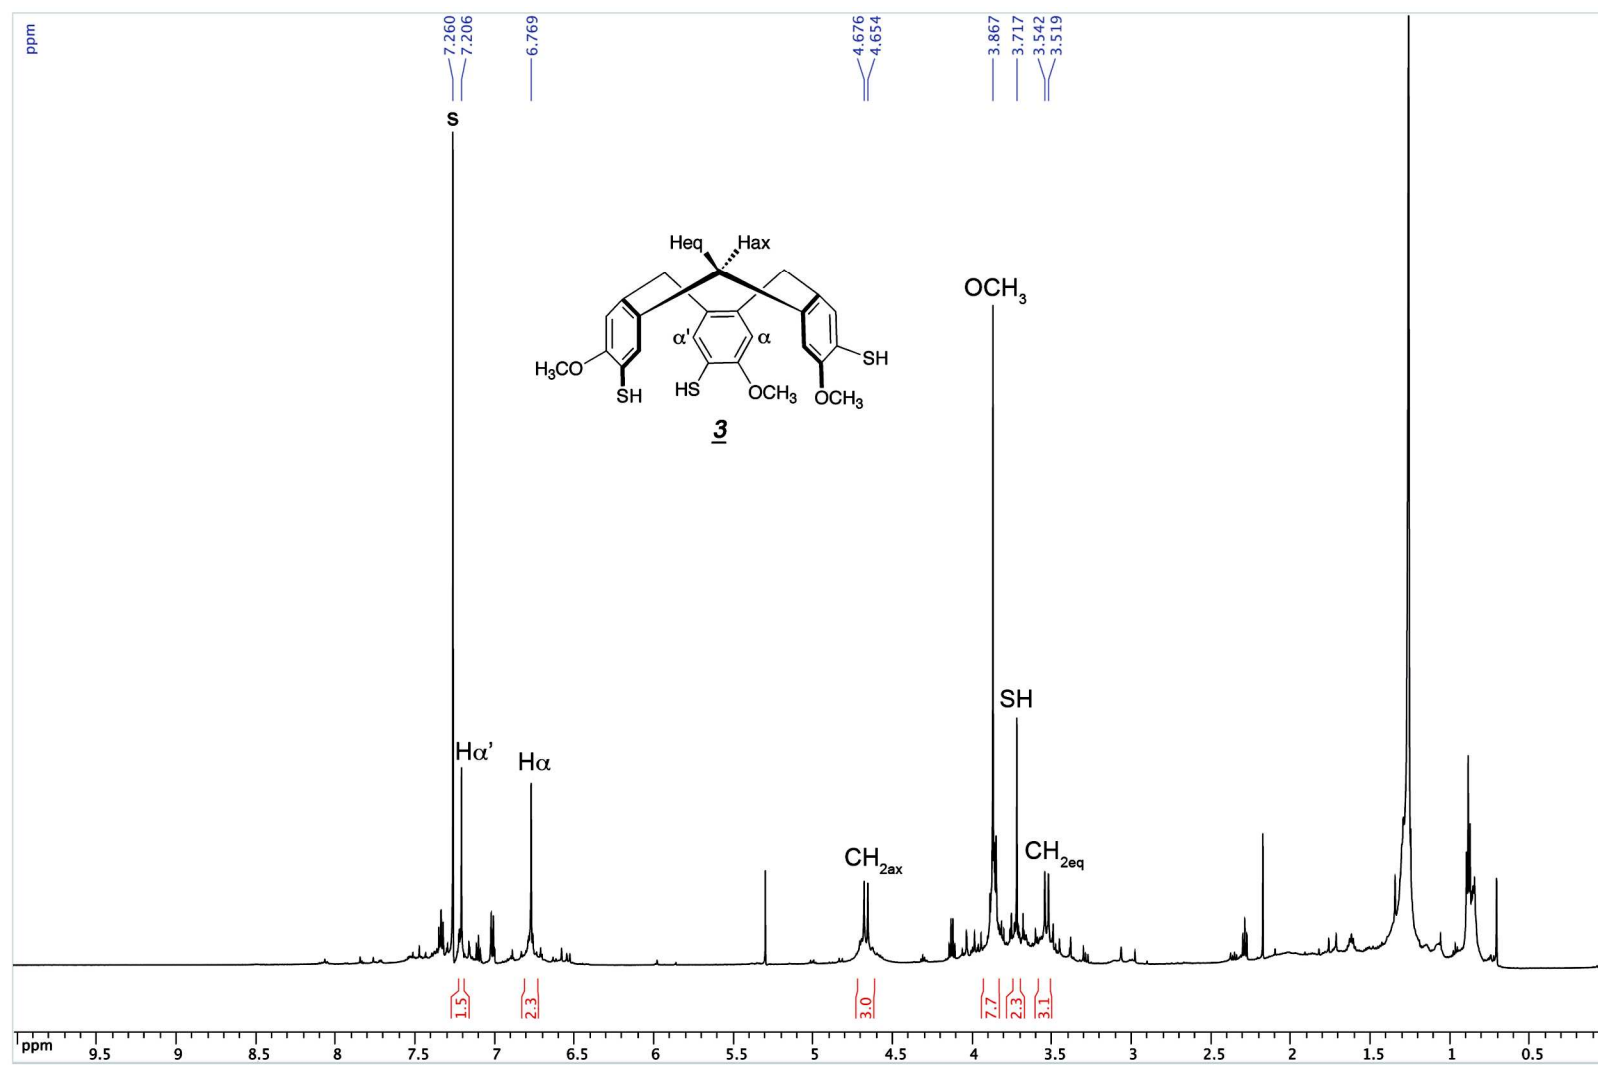

**Figure S 4:**  $^1\text{H}$  NMR spectrum of cyclotrithioguaiacylene **3** obtained from **6**.

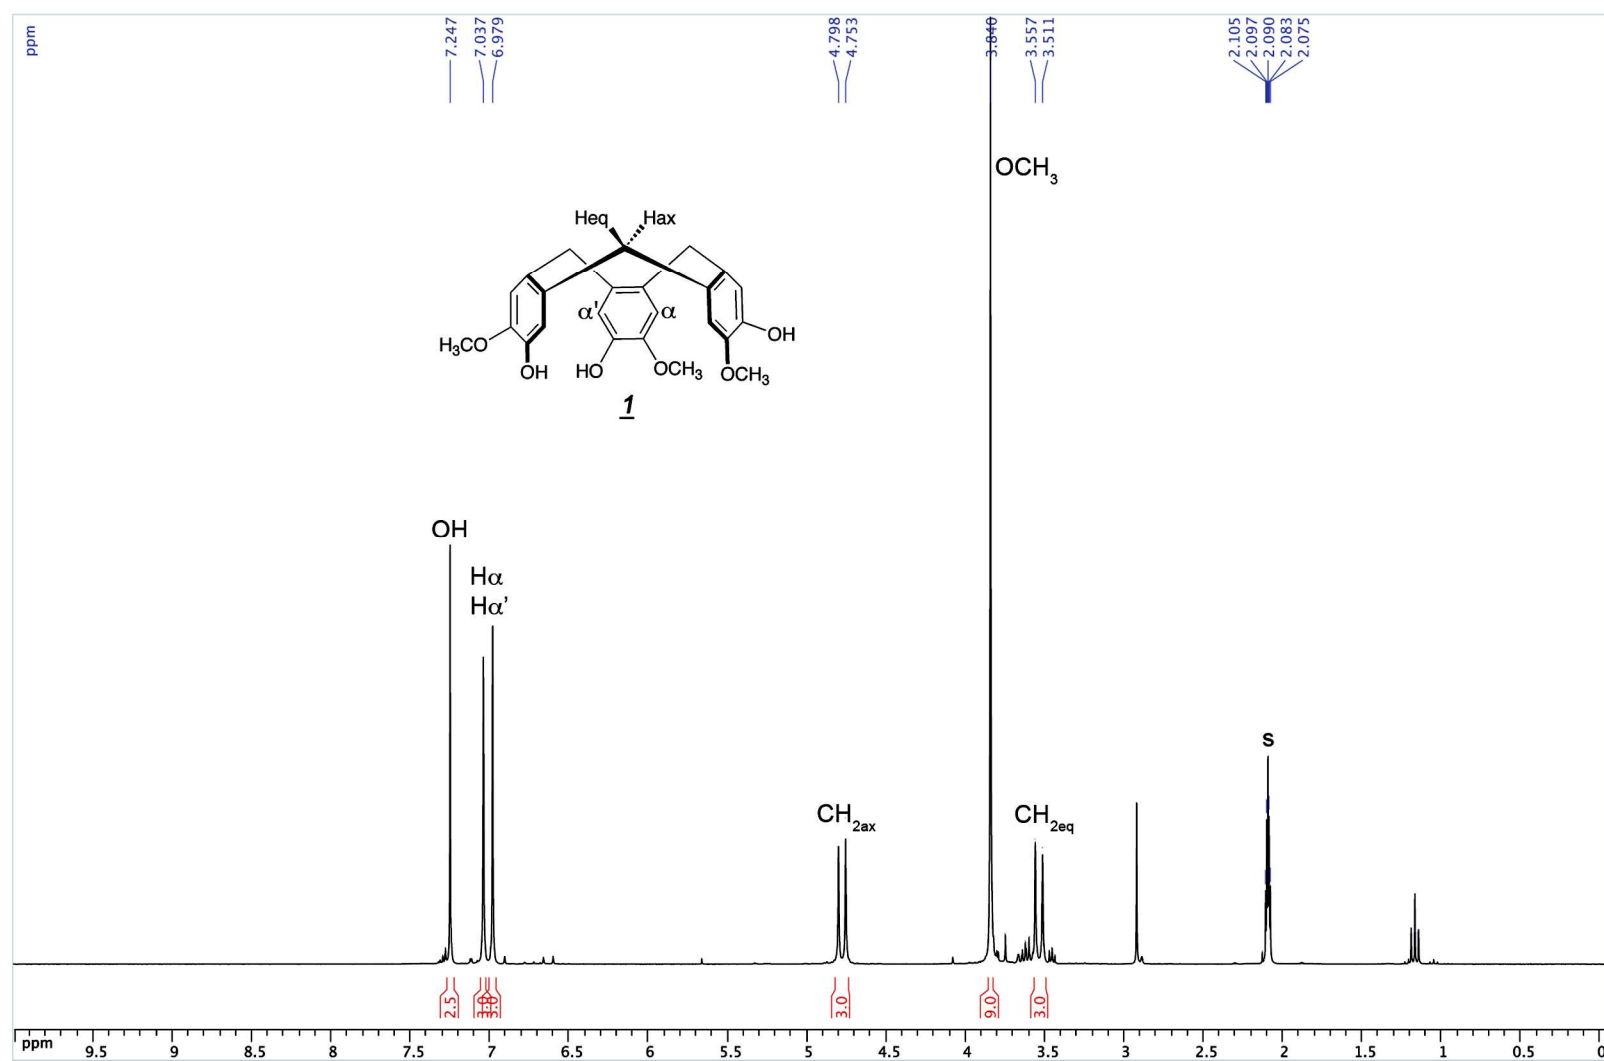

**Figure S 5:** <sup>1</sup>H NMR spectrum of compound **1** (300 MHz, d<sup>6</sup>-acetone).



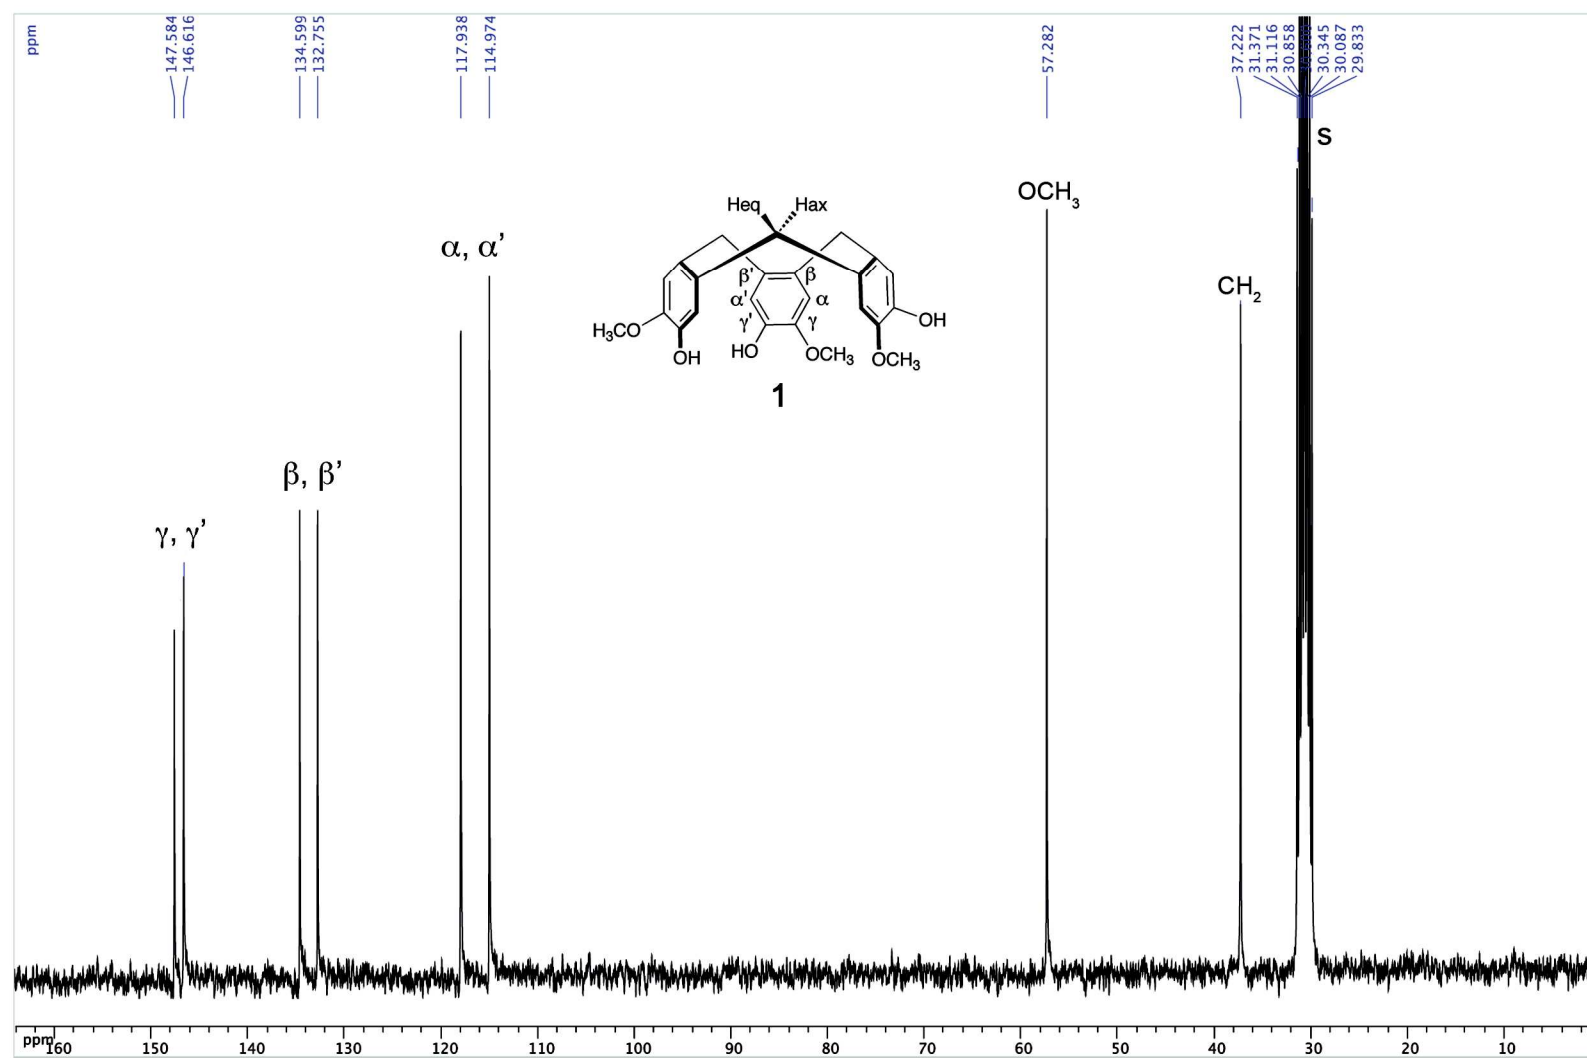

**Figure S 6:**  $^{13}\text{C}$  NMR spectrum of compound **1** (75 MHz,  $\text{d}^6$ -acetone).

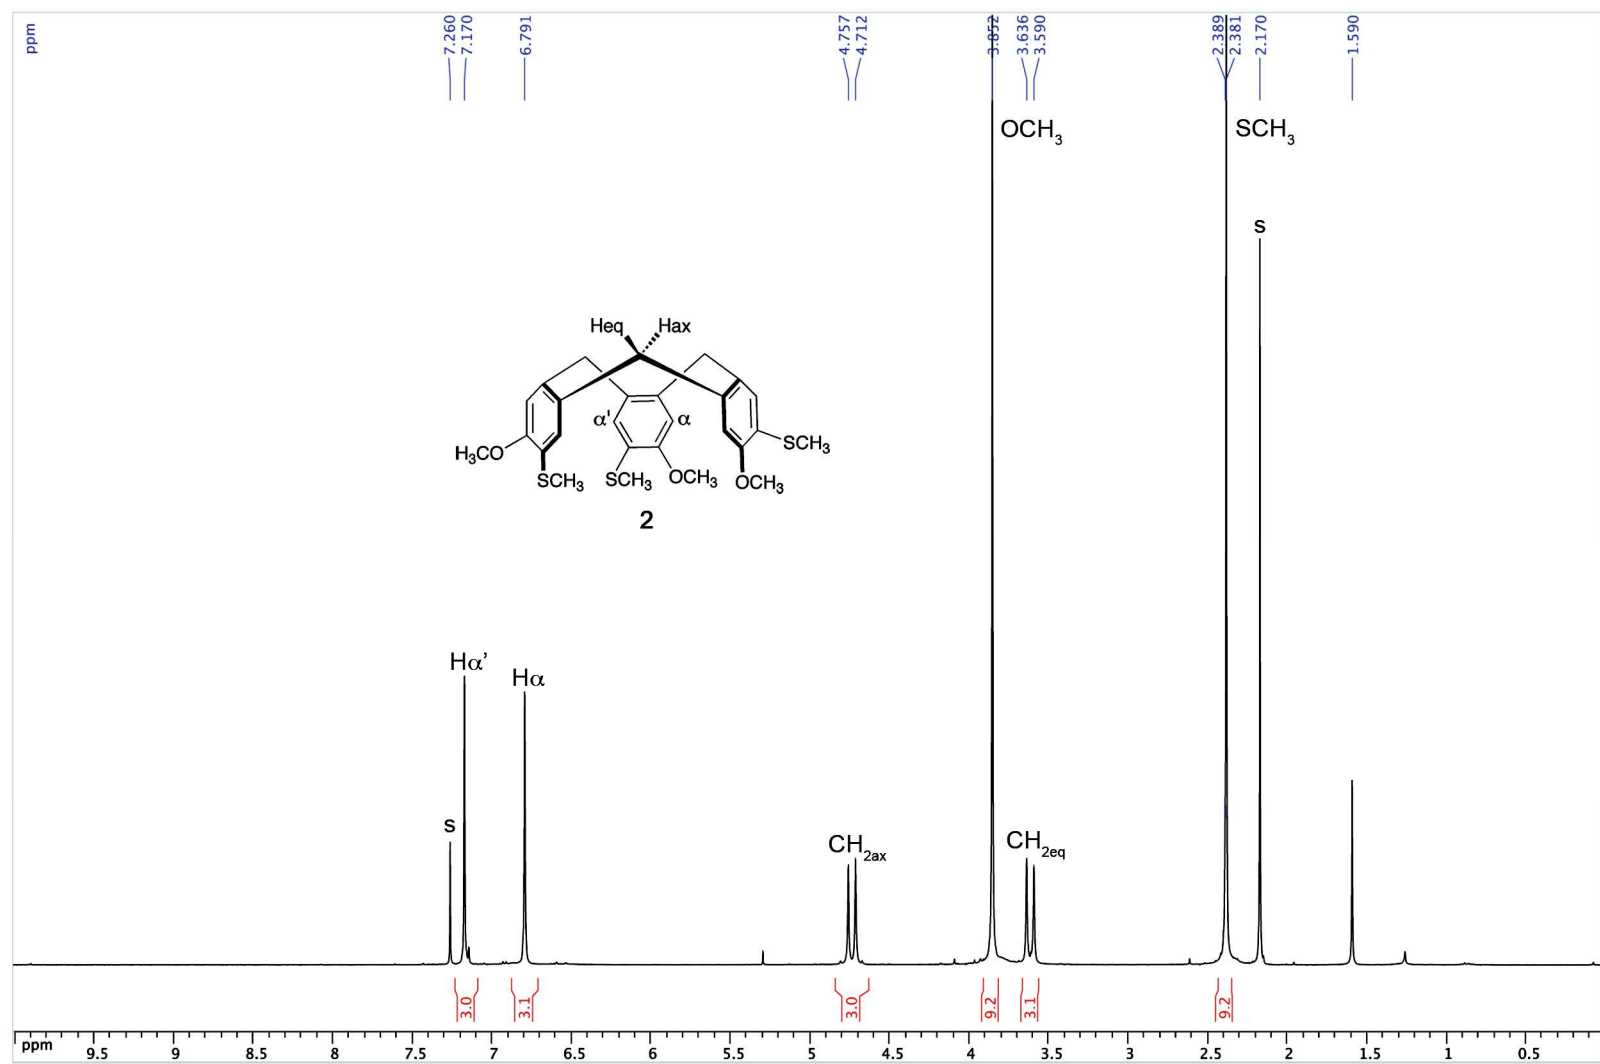

**Figure S 7:**  $^1\text{H}$  NMR spectrum of compound **2** (300 MHz,  $\text{CDCl}_3$ ).

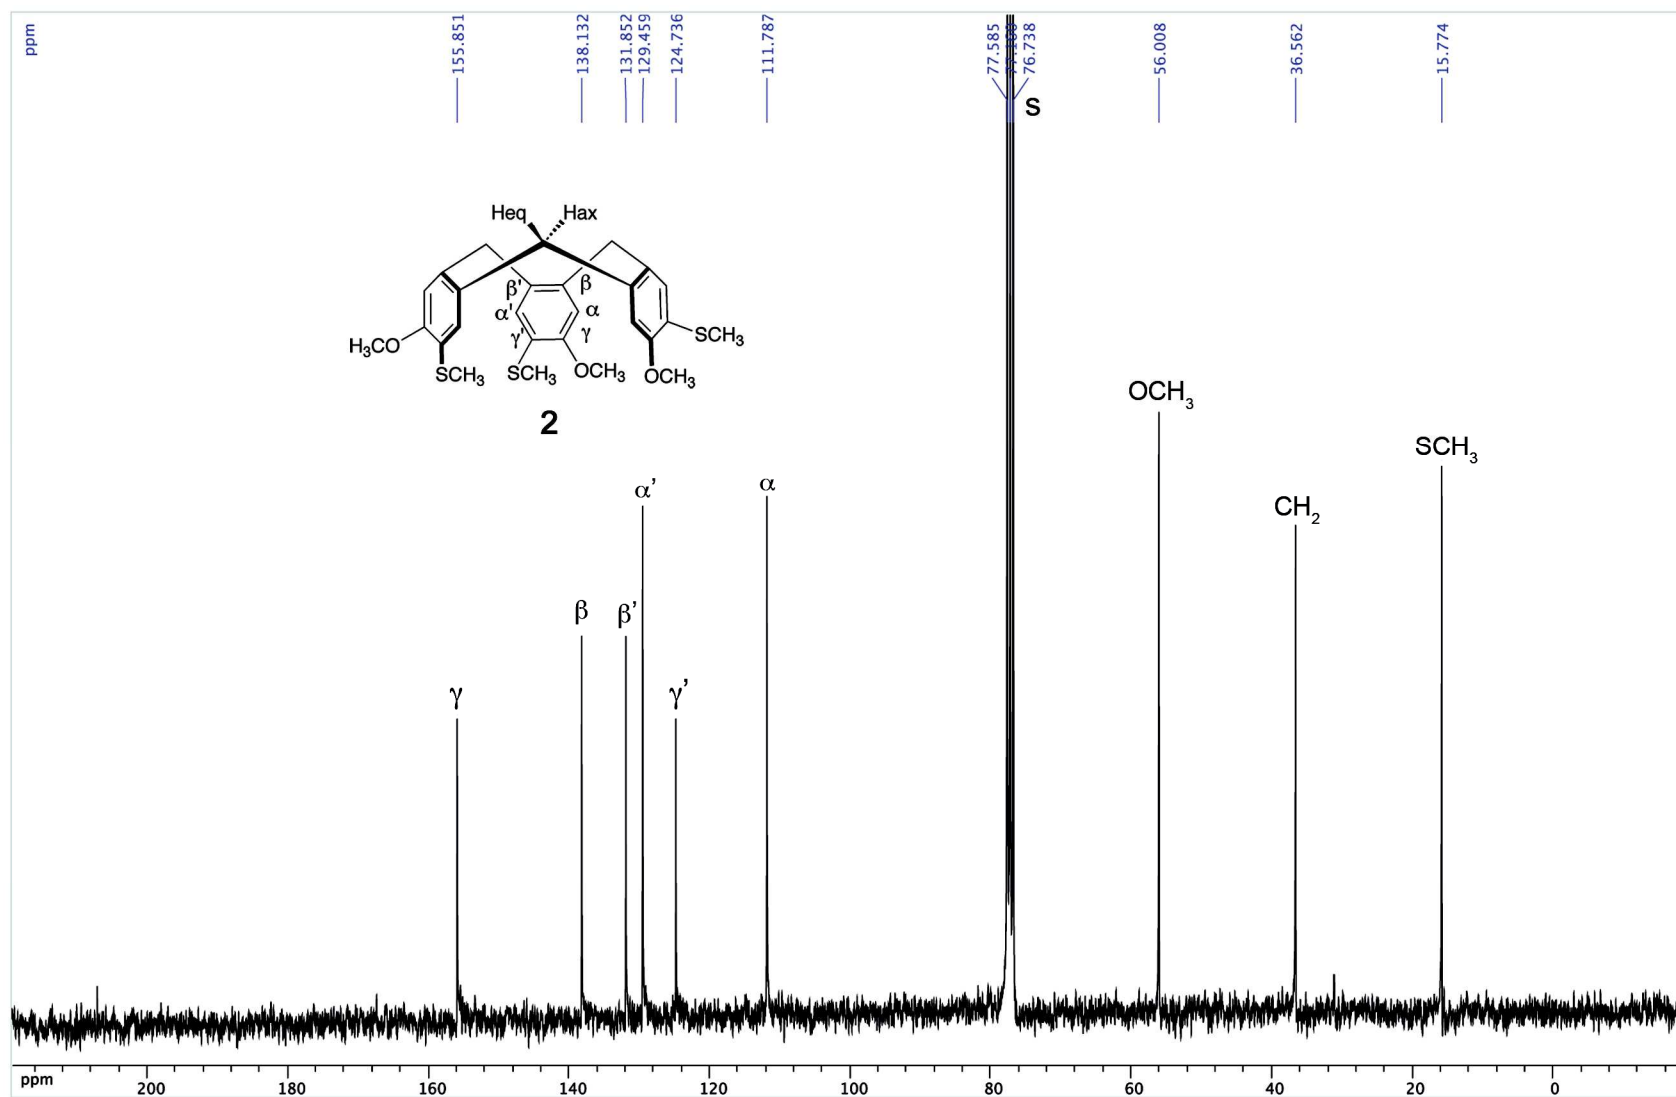

**Figure S 8:** <sup>13</sup>C NMR spectrum of compound **2** (75 MHz, CDCl<sub>3</sub>).

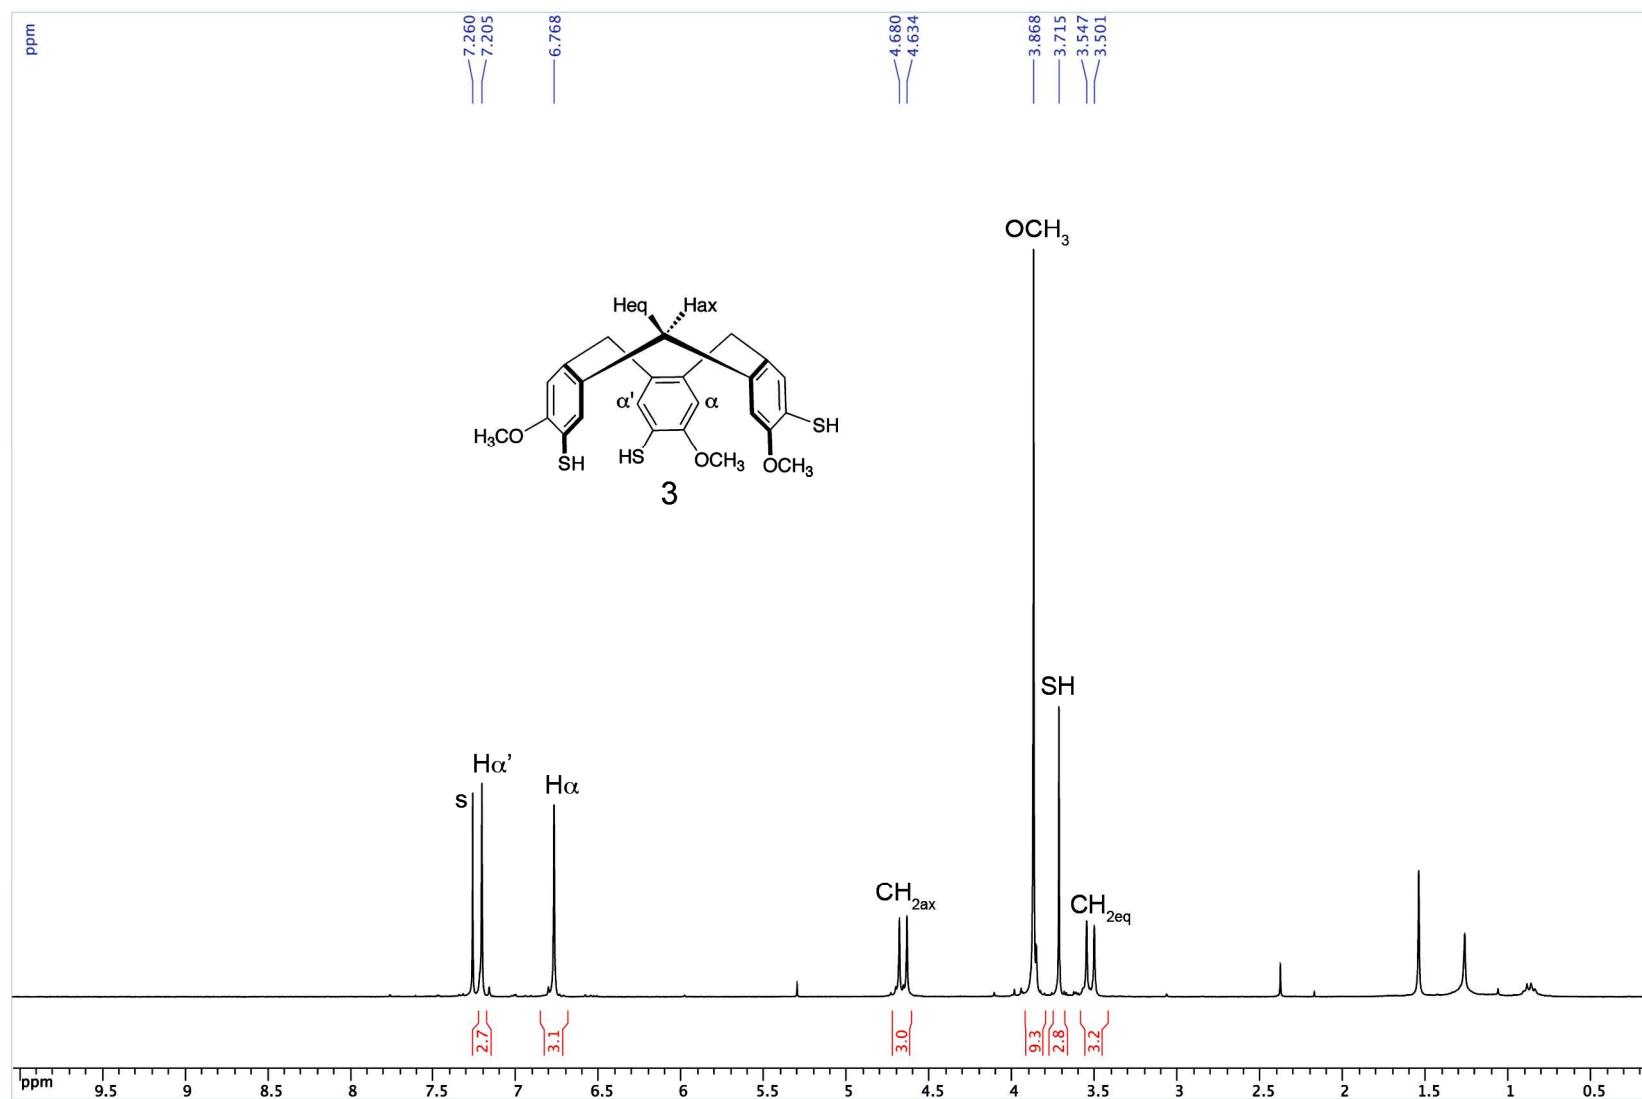

**Figure S 9:**  $^1\text{H}$  NMR spectrum of compound **3** (300 MHz,  $\text{CDCl}_3$ ).

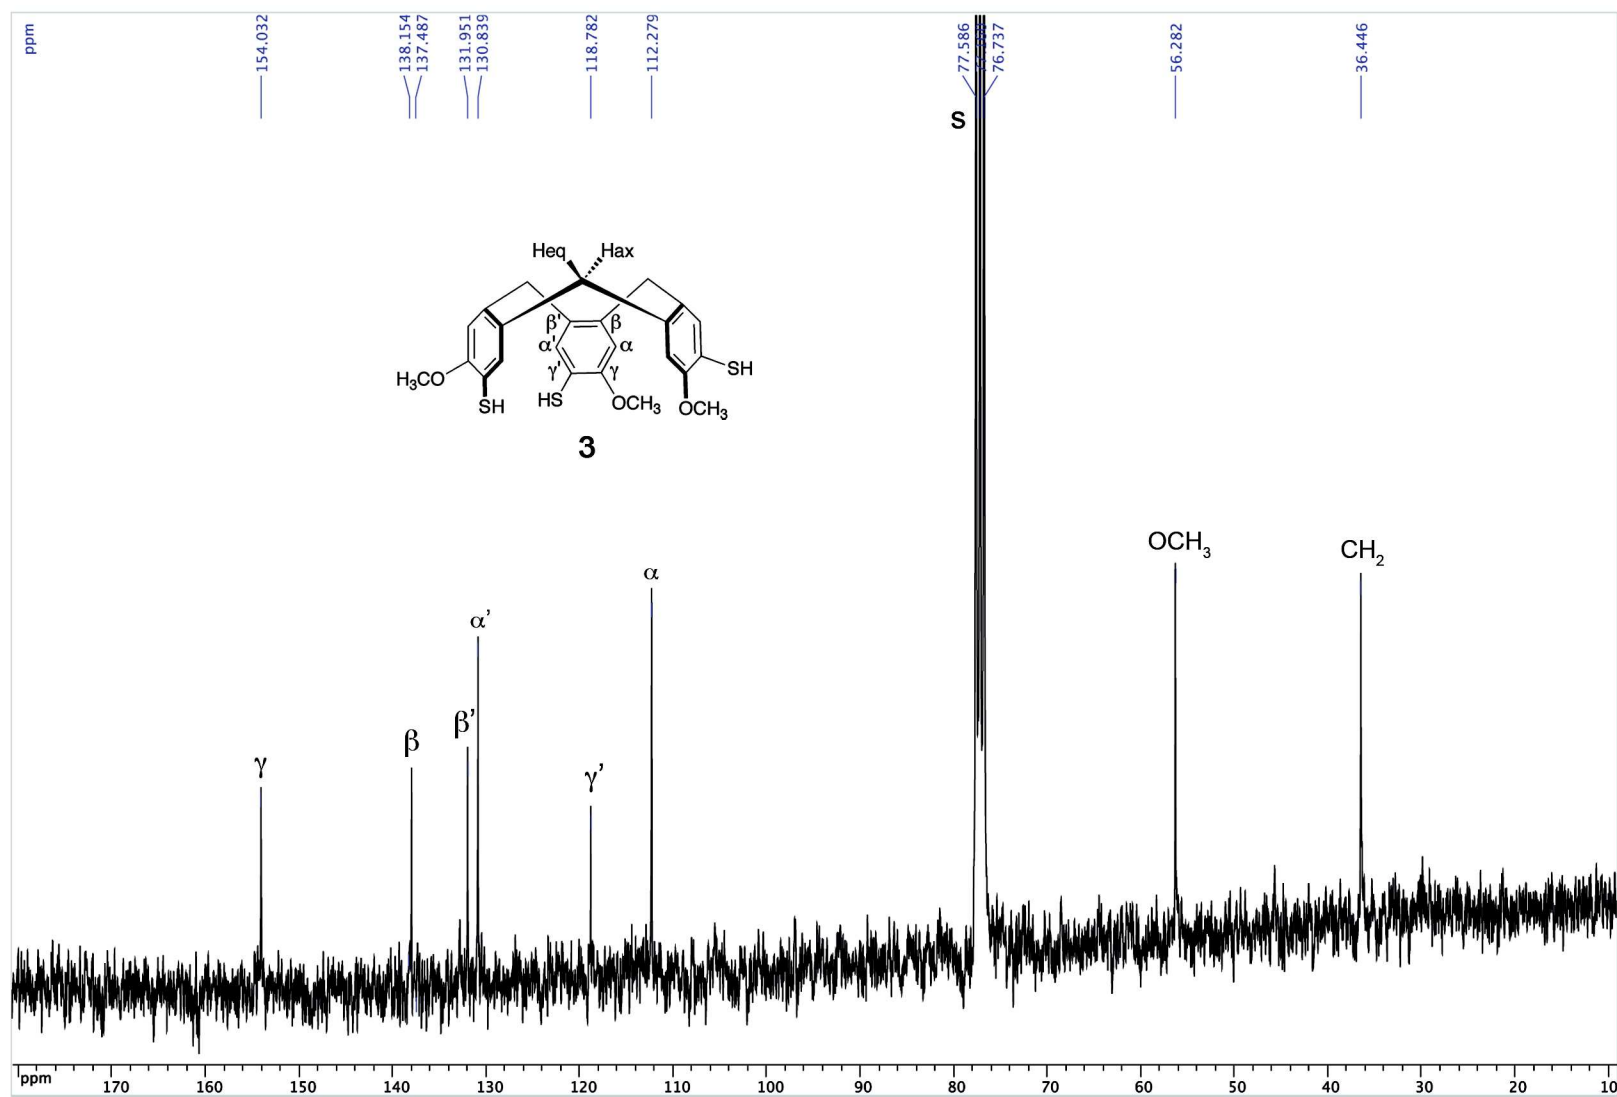

**Figure S 10:**  $^{13}\text{C}$  NMR spectrum of compound **3** (75 MHz,  $\text{CDCl}_3$ ).

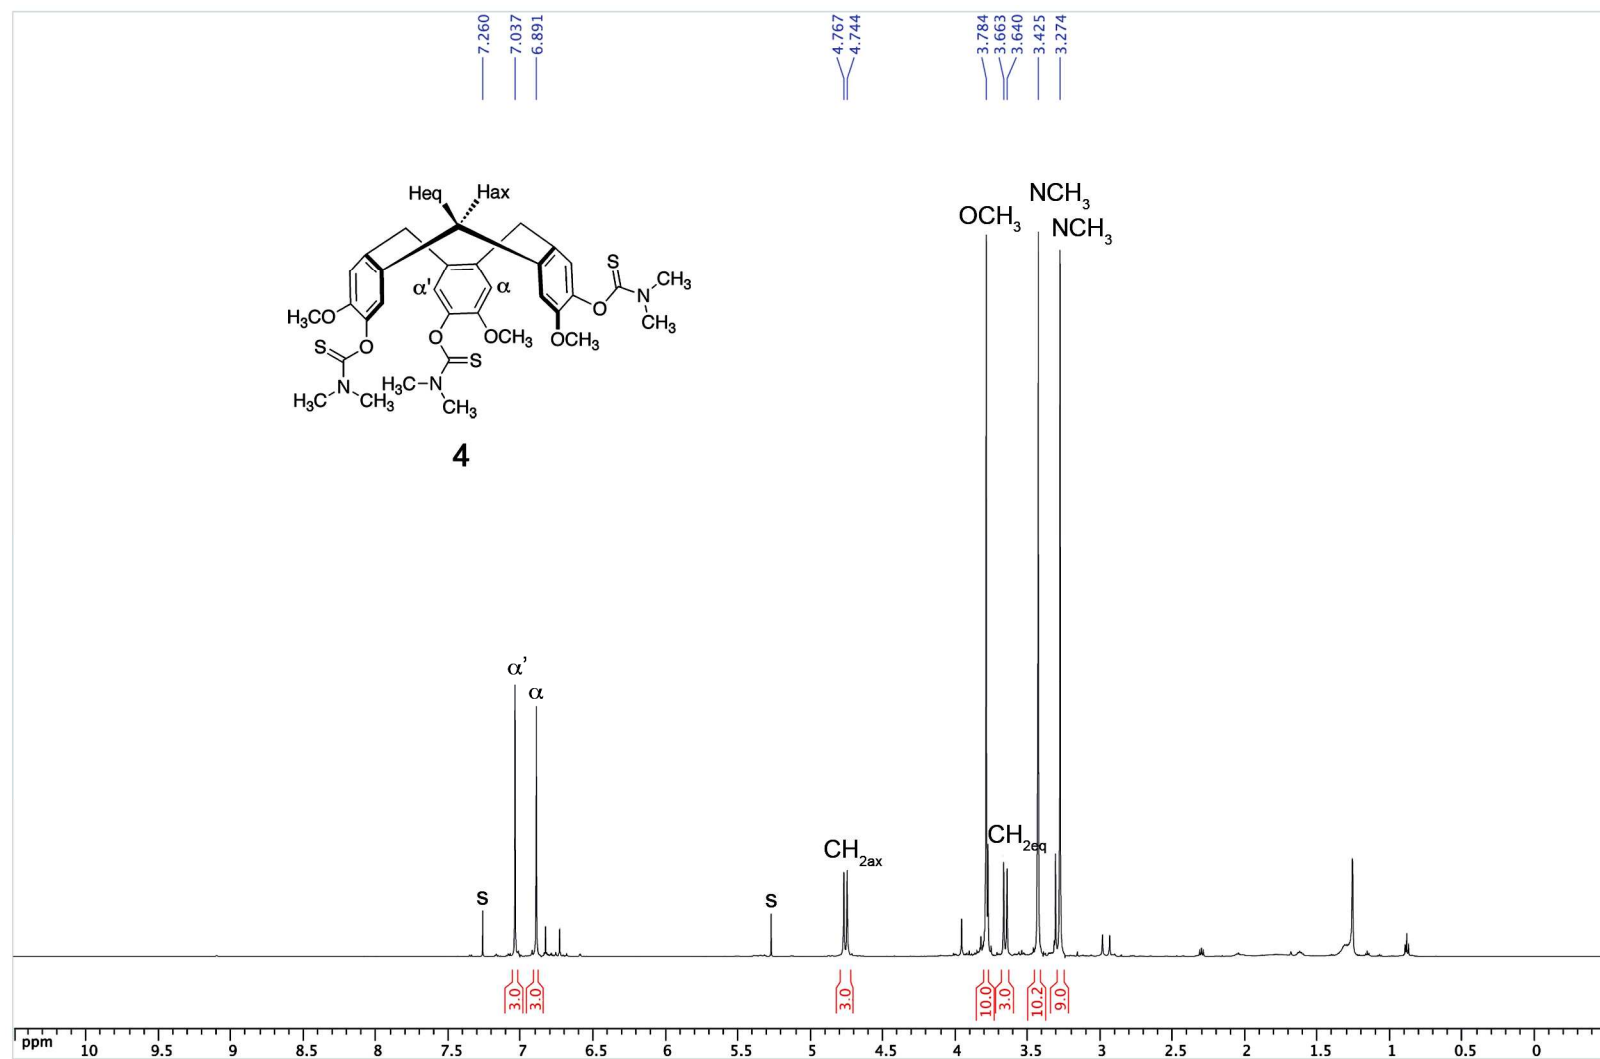

**Figure S 11:** <sup>1</sup>H NMR spectrum of compound **4** (600 MHz, CDCl<sub>3</sub>).

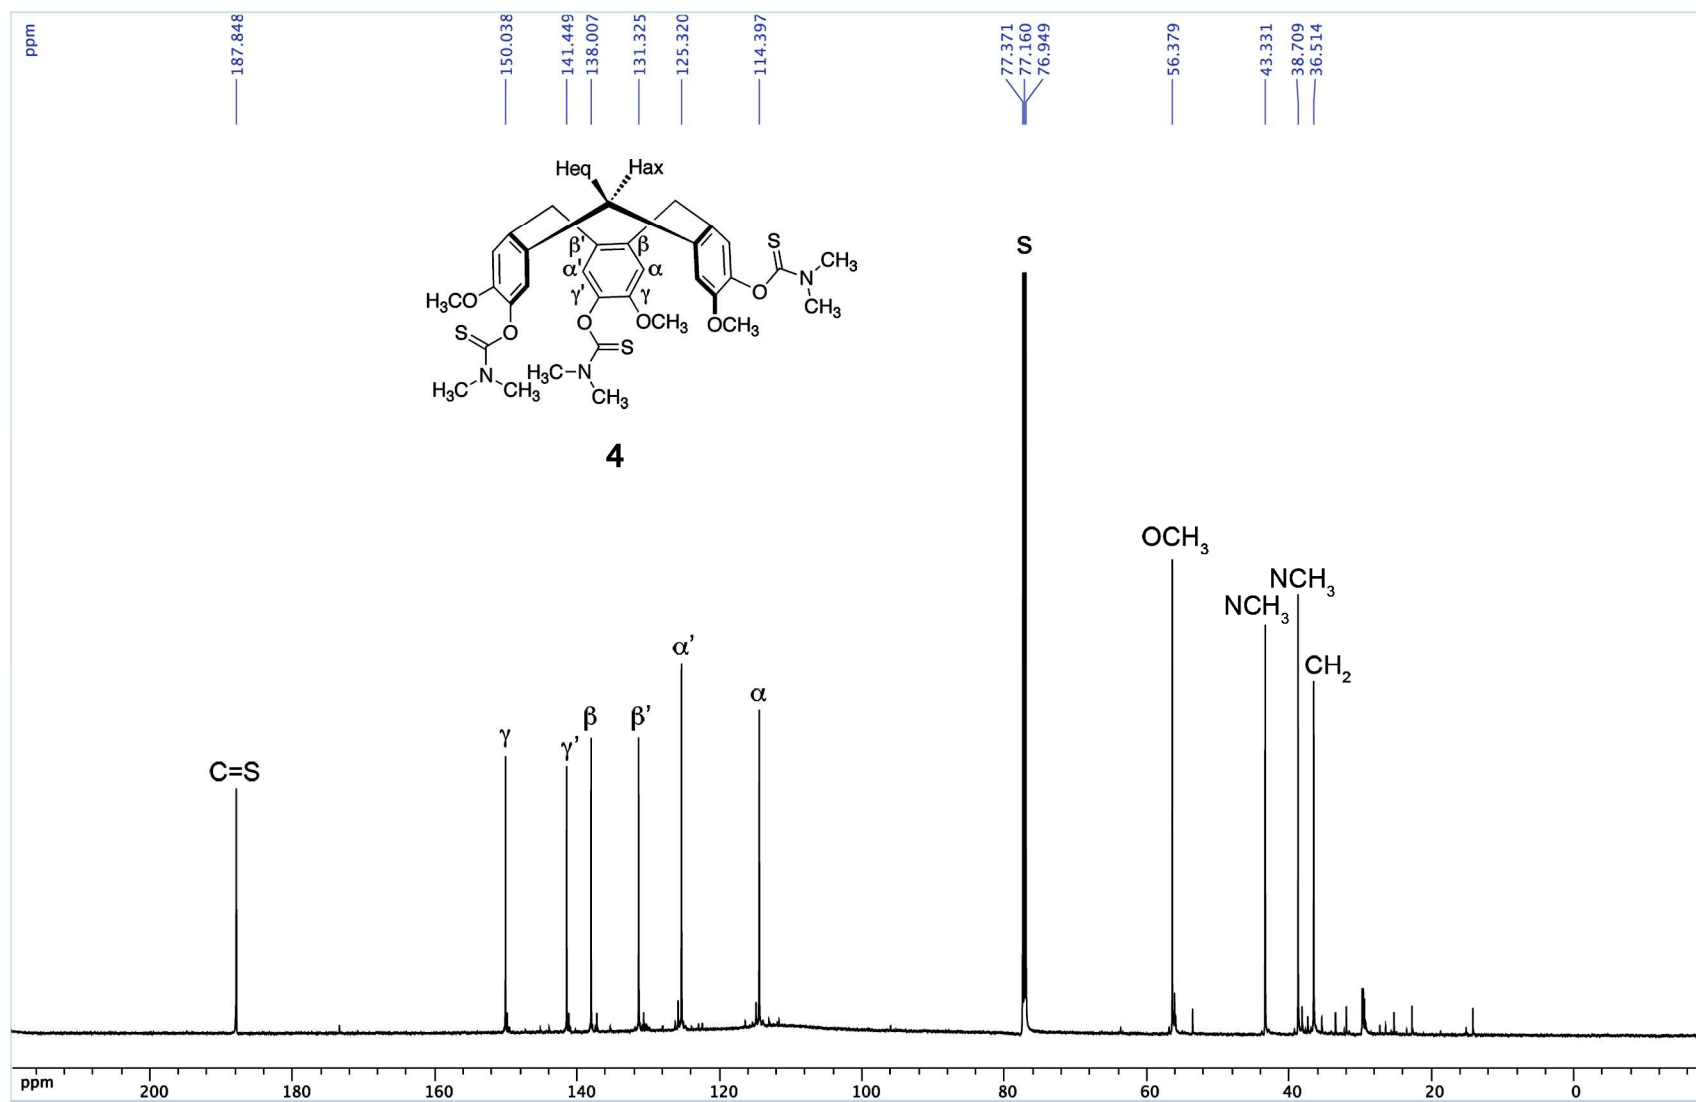

**Figure S 12:**  $^{13}\text{C}$  NMR spectrum of compound **4** (75 MHz,  $\text{CDCl}_3$ ).





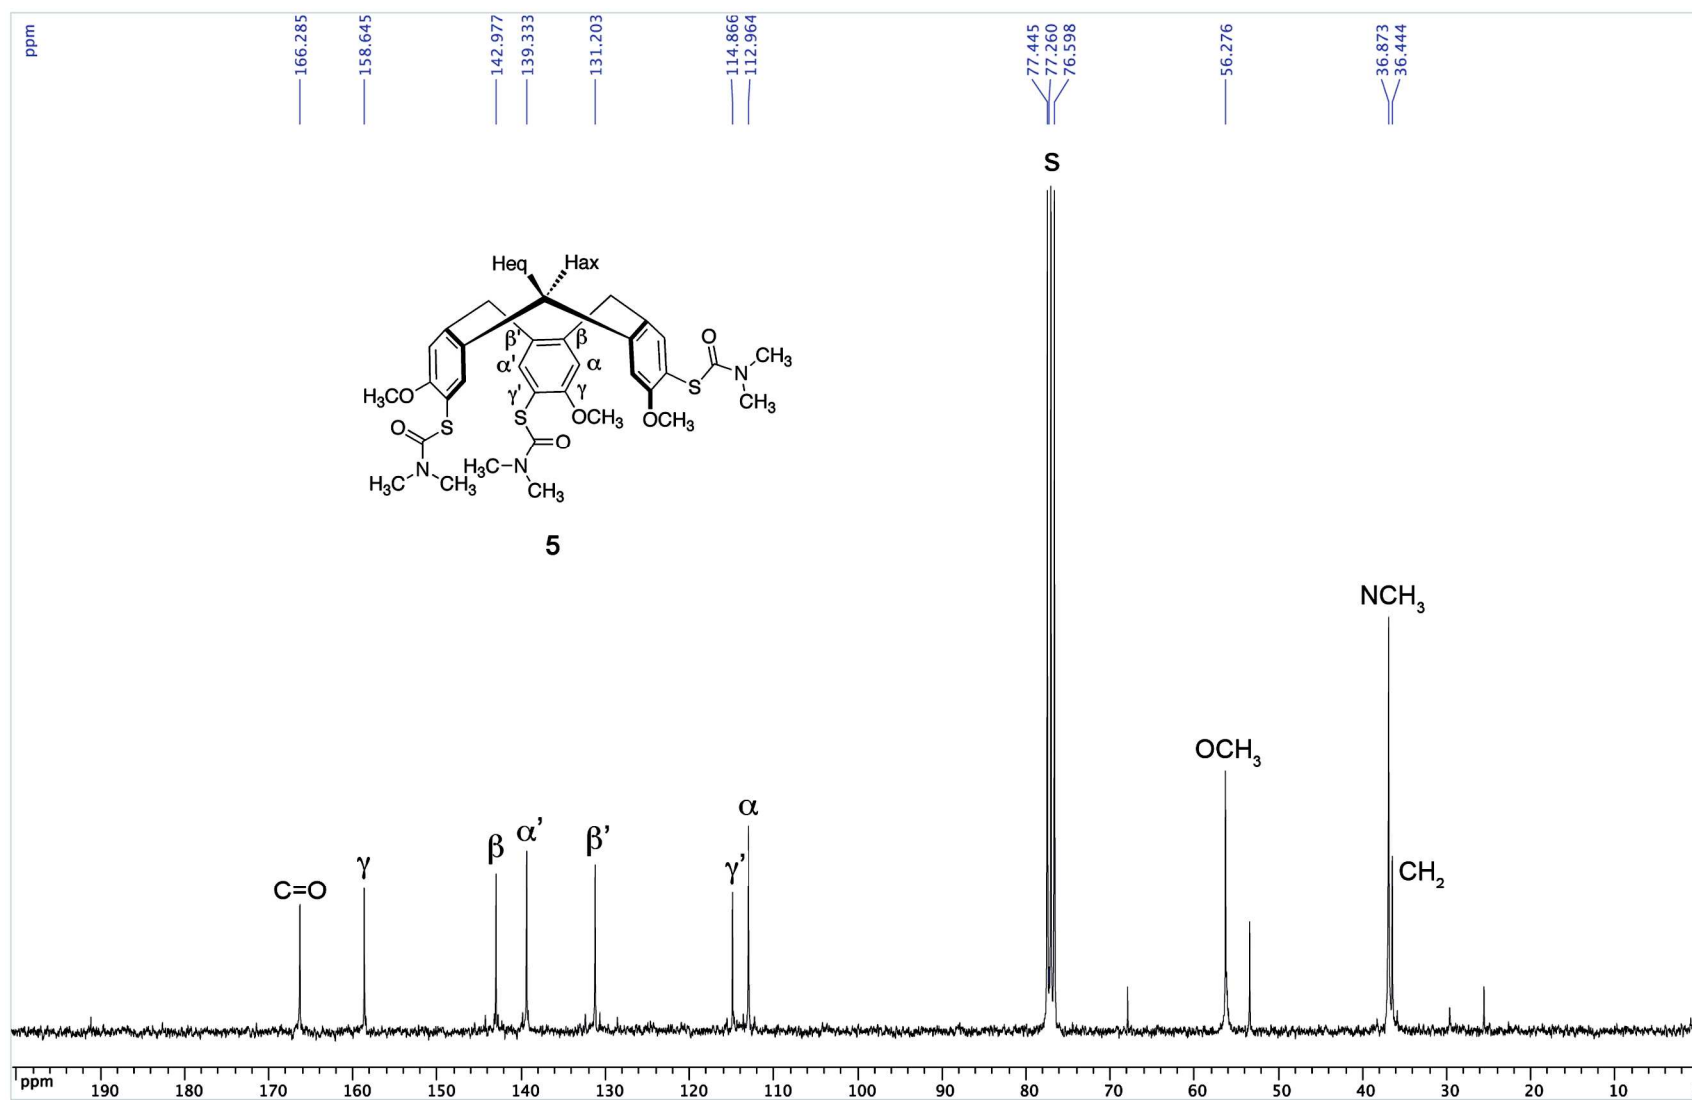

**Figure S 14:** <sup>13</sup>C NMR spectrum of compound **5** (75 MHz, CDCl<sub>3</sub>).

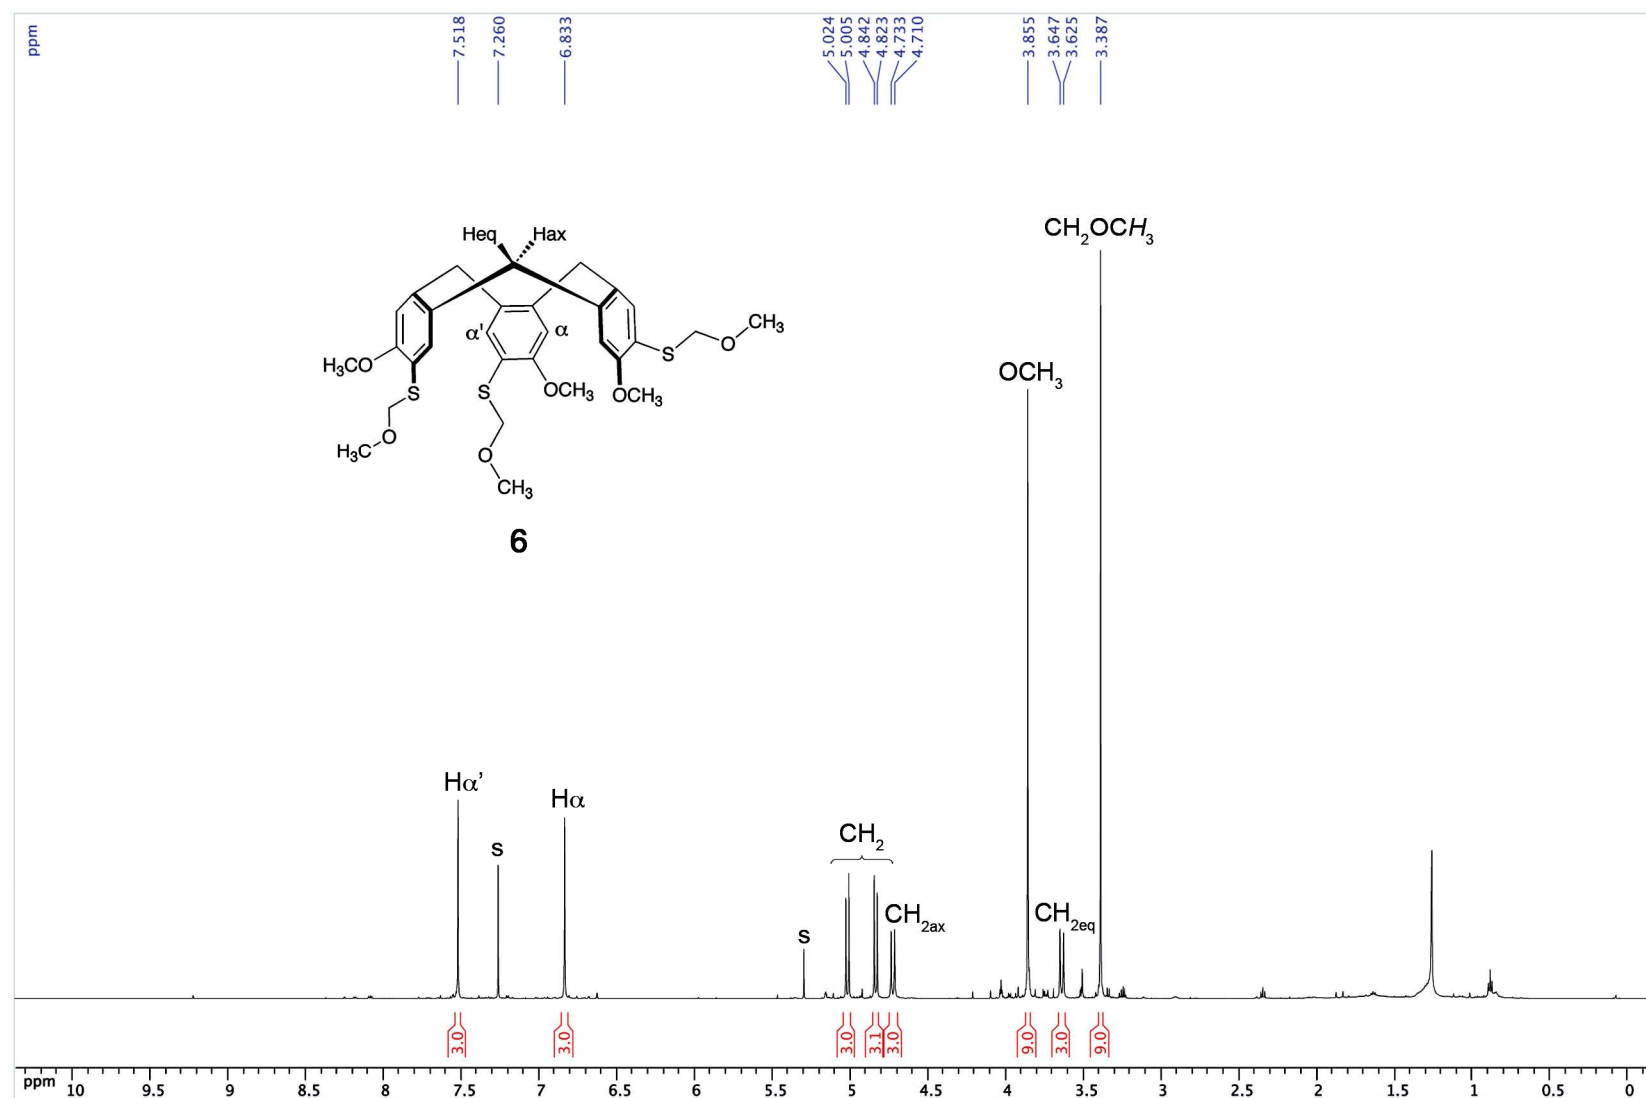

**Figure S 15:**  $^1\text{H}$  NMR spectrum of compound **6** (600 MHz,  $\text{CDCl}_3$ ).

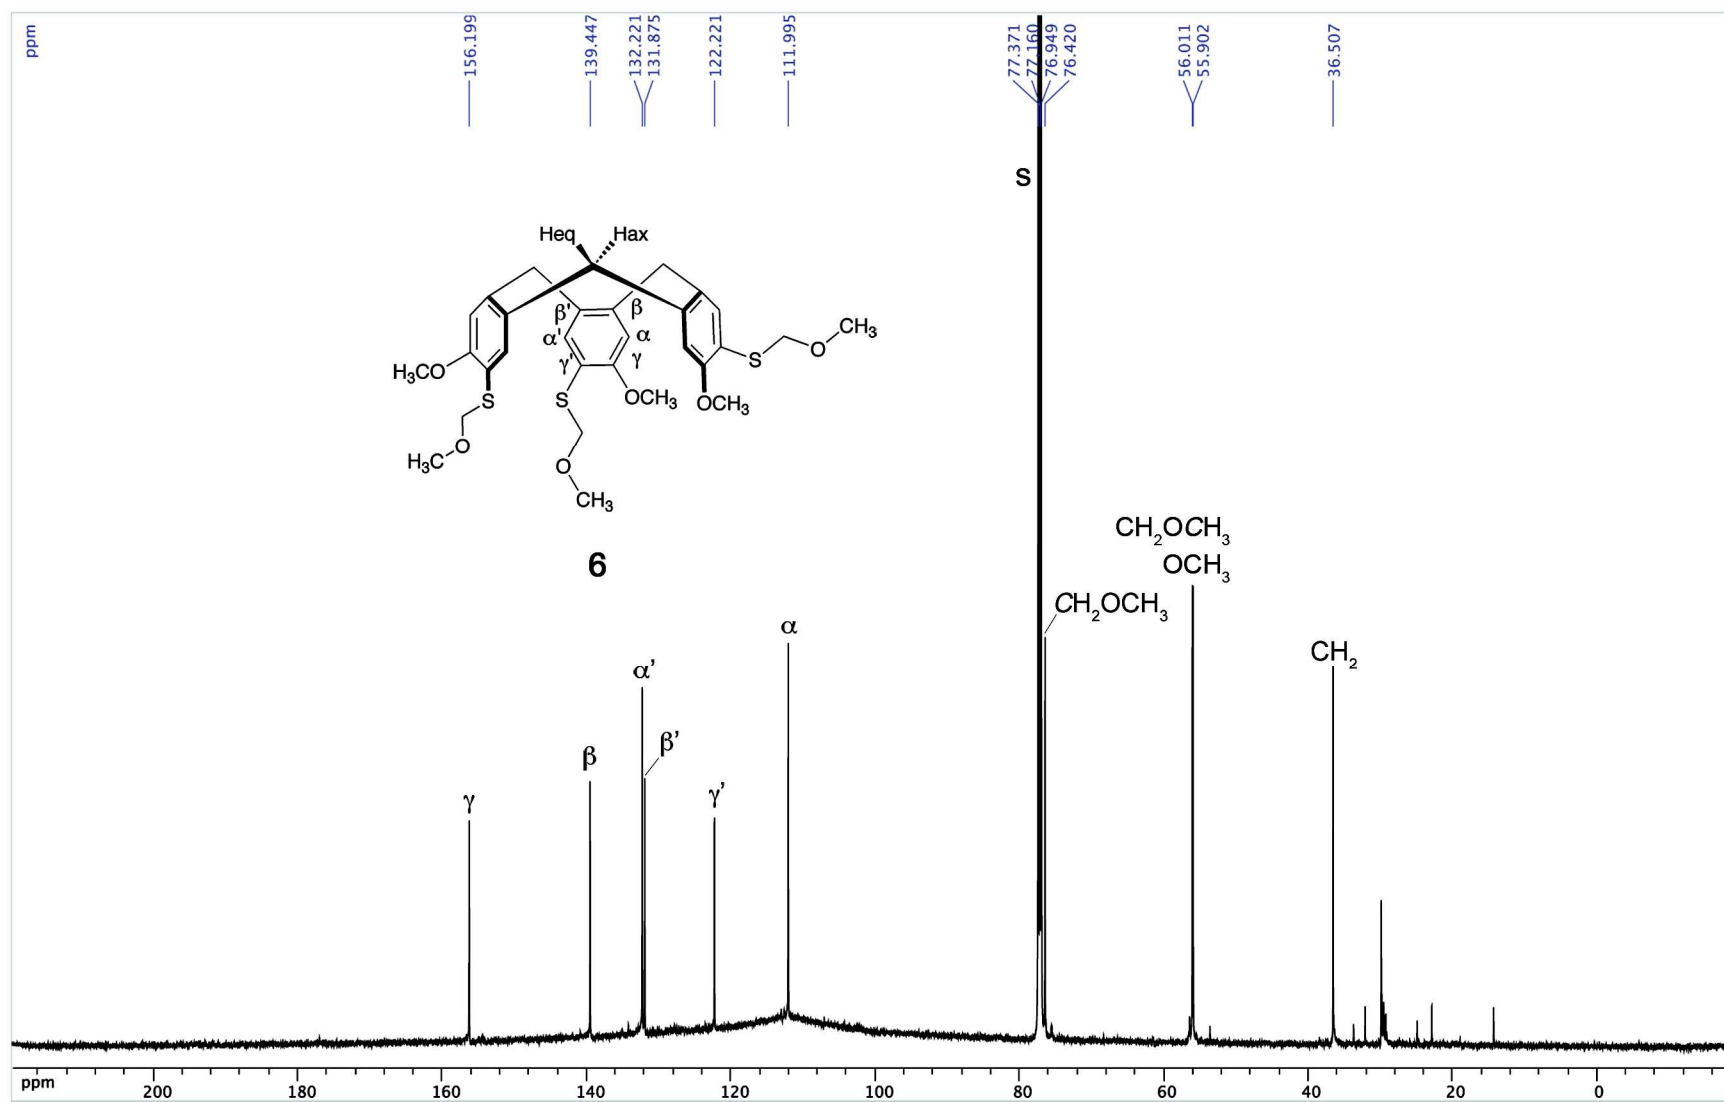

**Figure S 16:**  $^{13}\text{C}$  NMR spectrum of compound **6** (75 MHz,  $\text{CDCl}_3$ ).

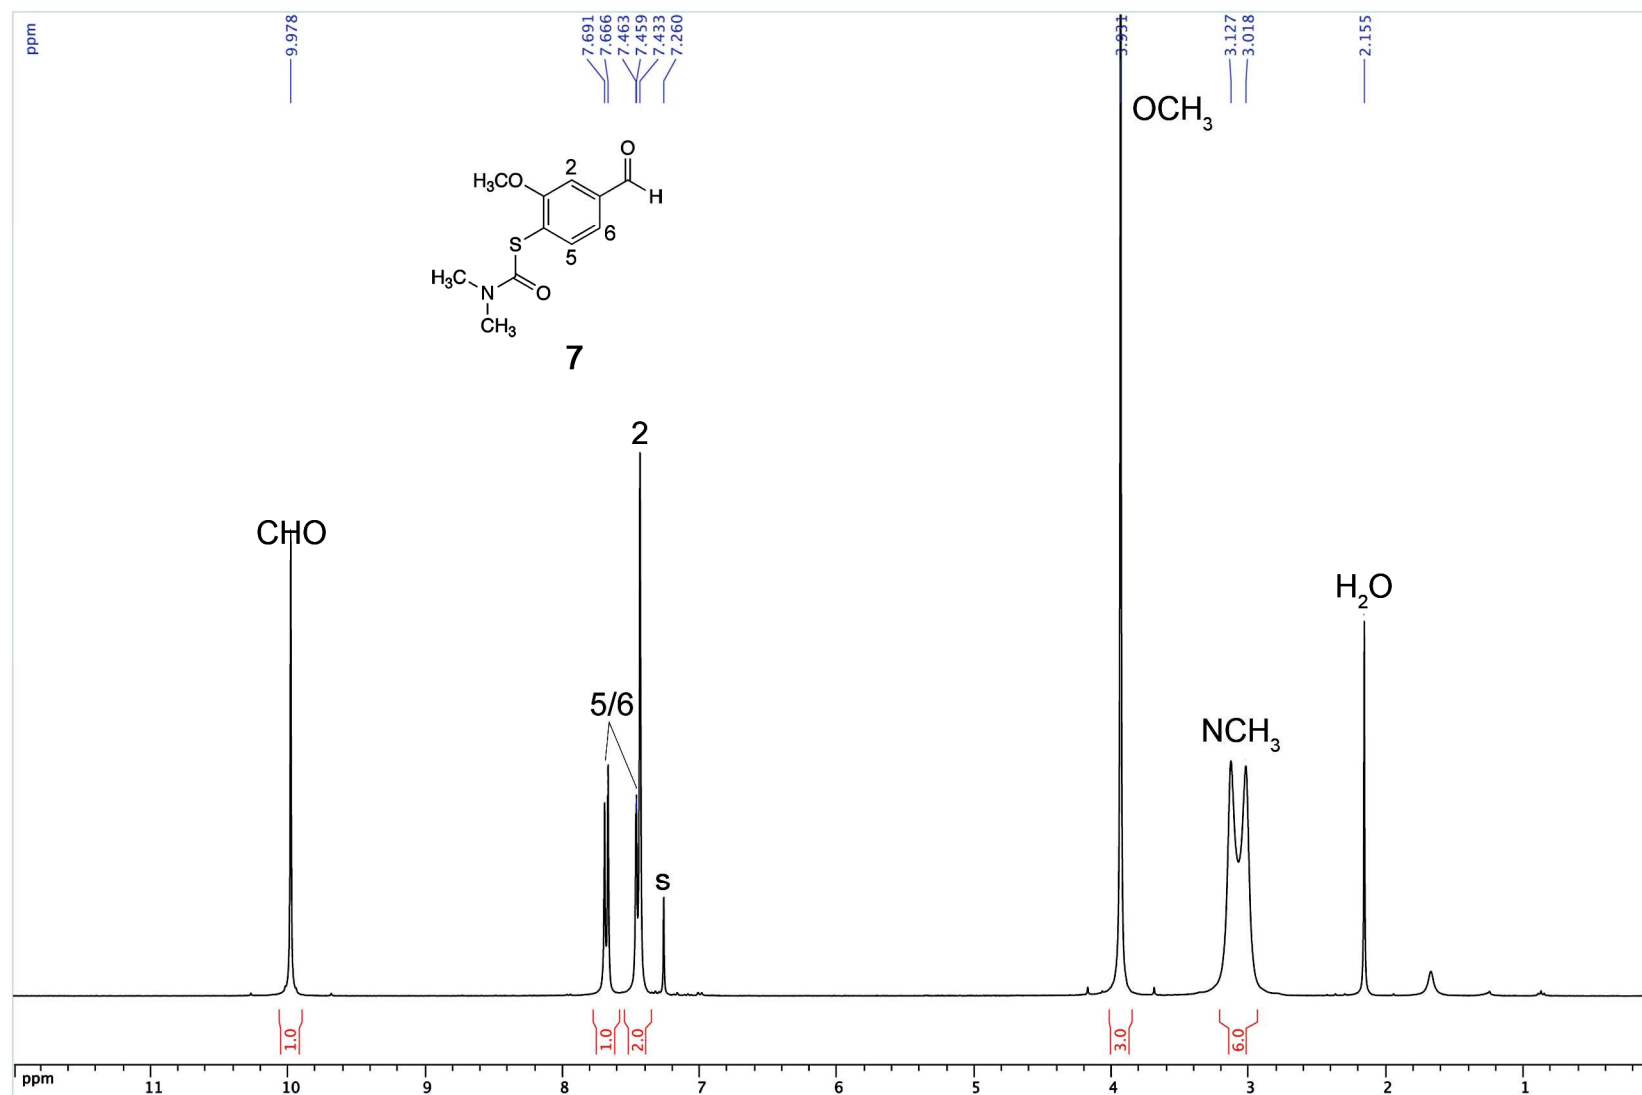

**Figure S 17:** <sup>1</sup>H NMR spectrum of compound **7** (300 MHz, CDCl<sub>3</sub>).

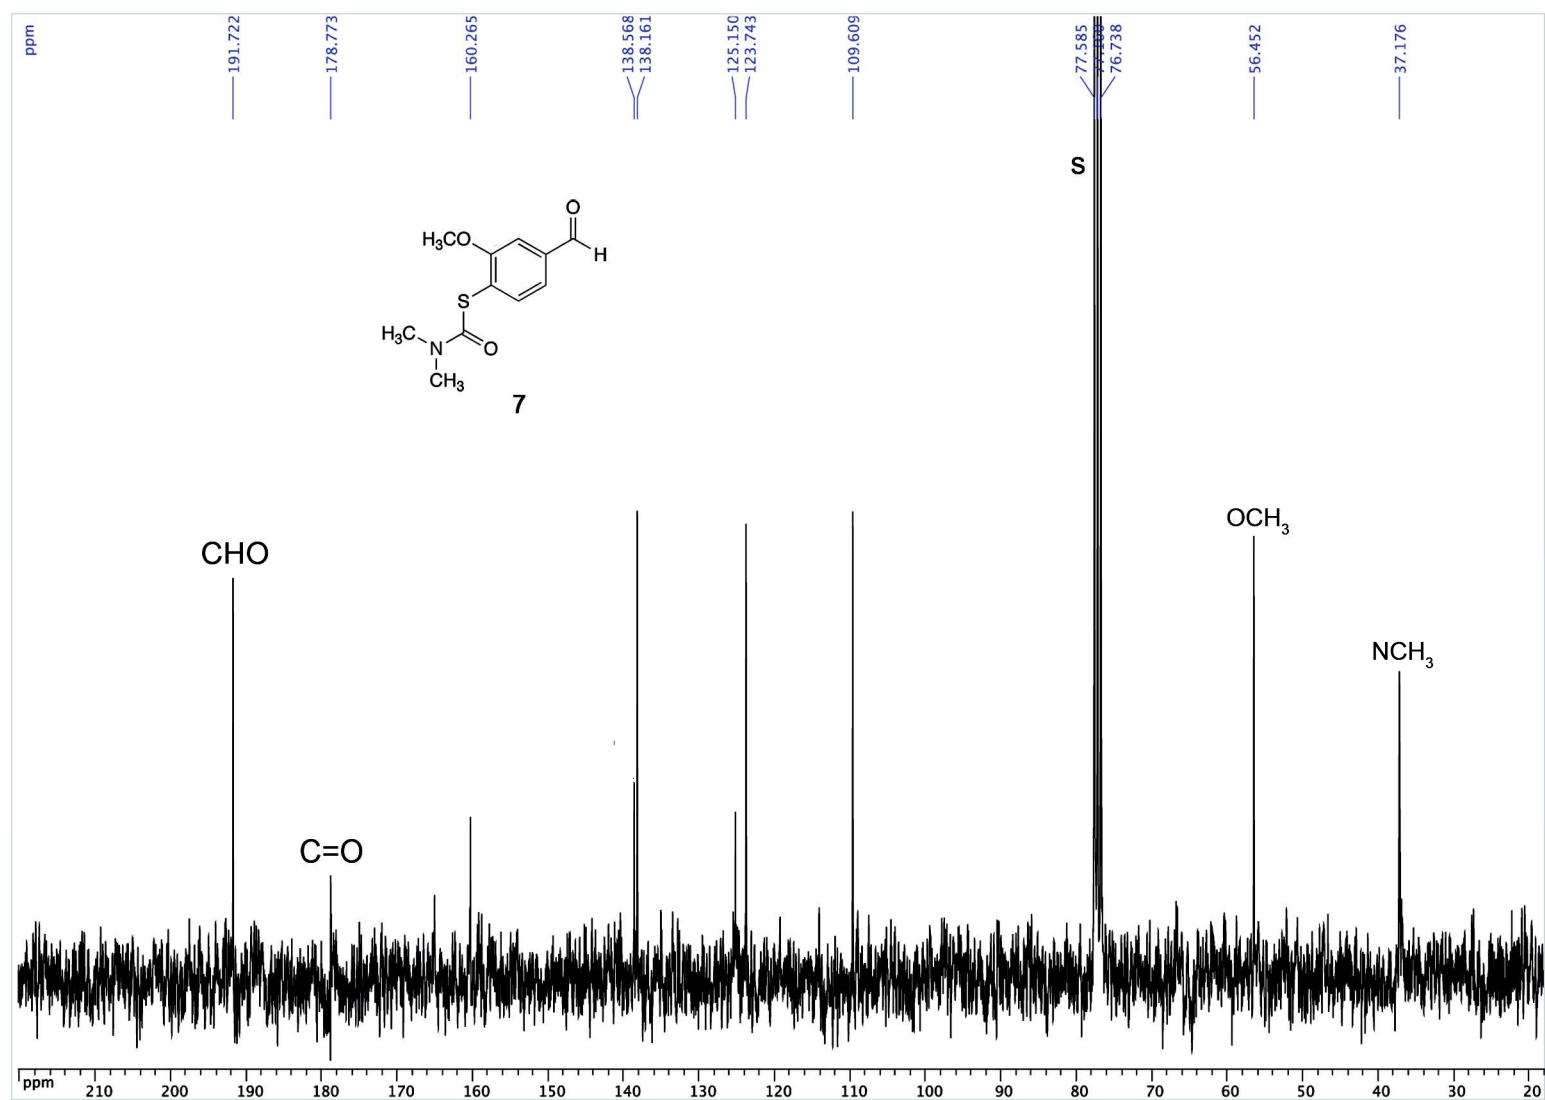

**Figure S 18:** <sup>13</sup>C NMR spectrum of compound **7** (75 MHz, CDCl<sub>3</sub>).

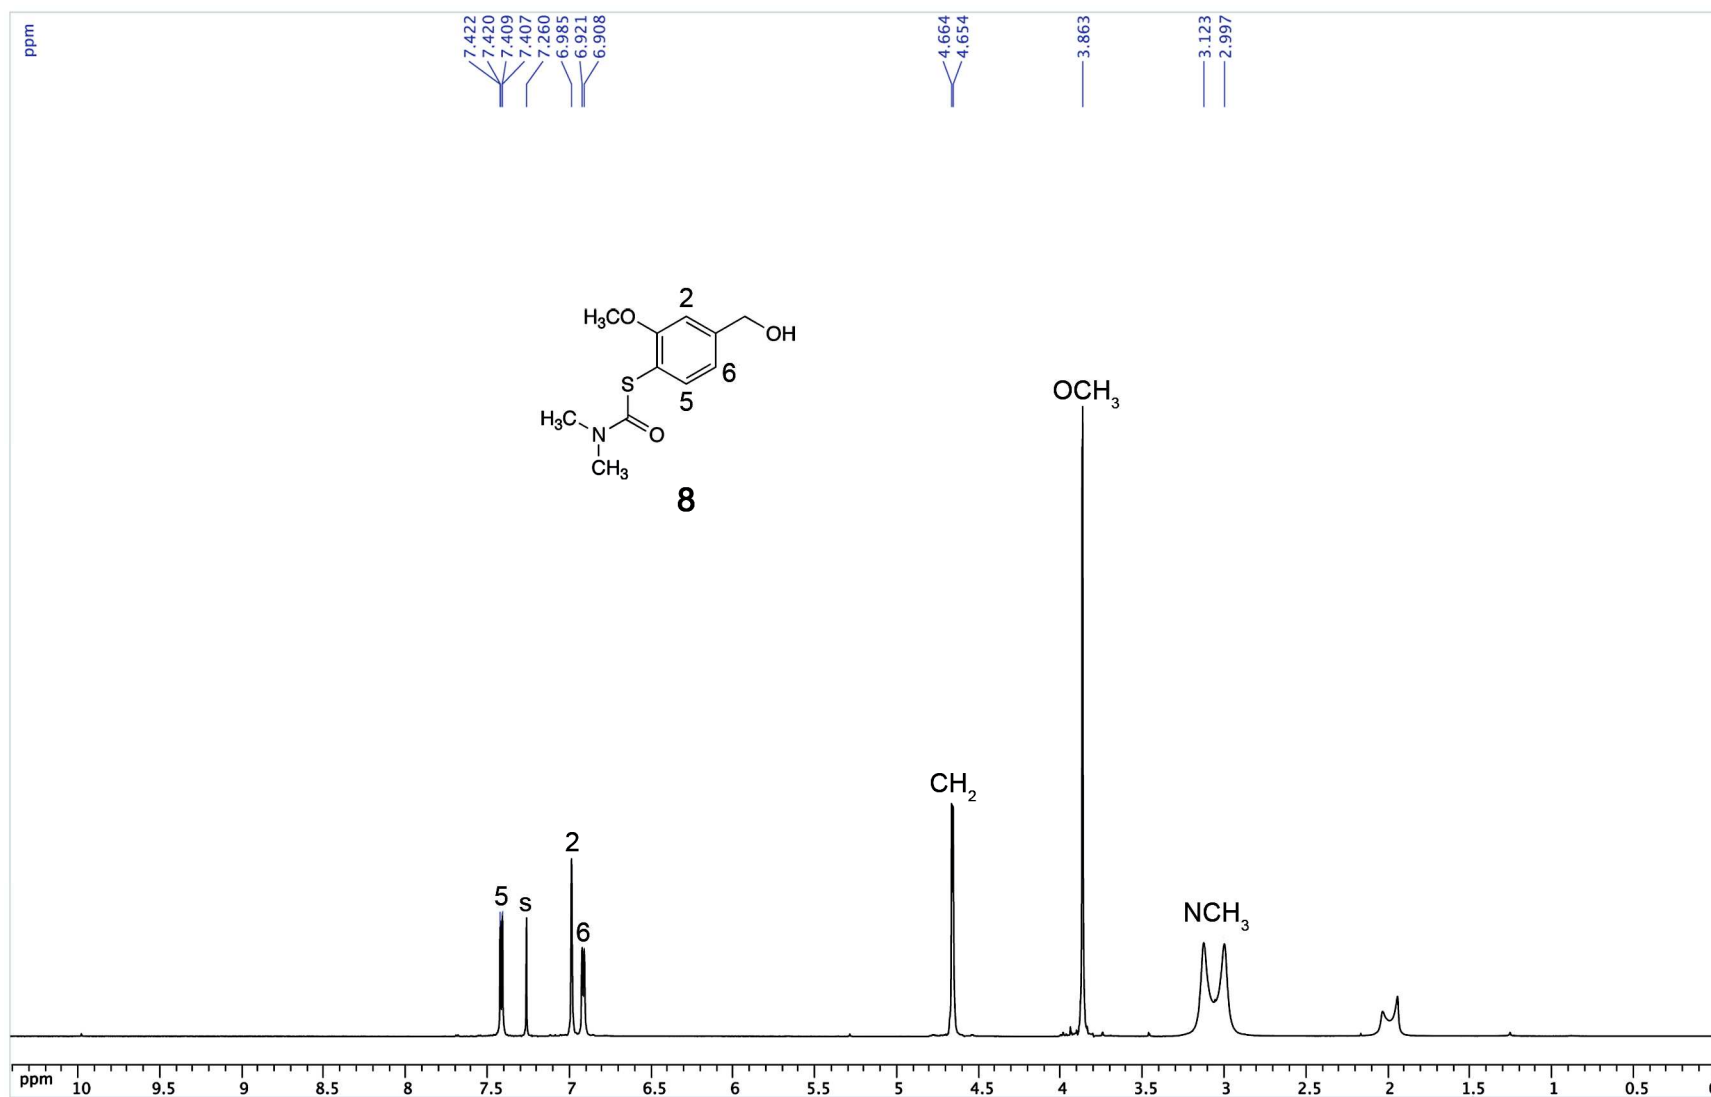

**Figure S 19:**  $^1\text{H}$  NMR spectrum of compound **8** (300 MHz,  $\text{CDCl}_3$ ).

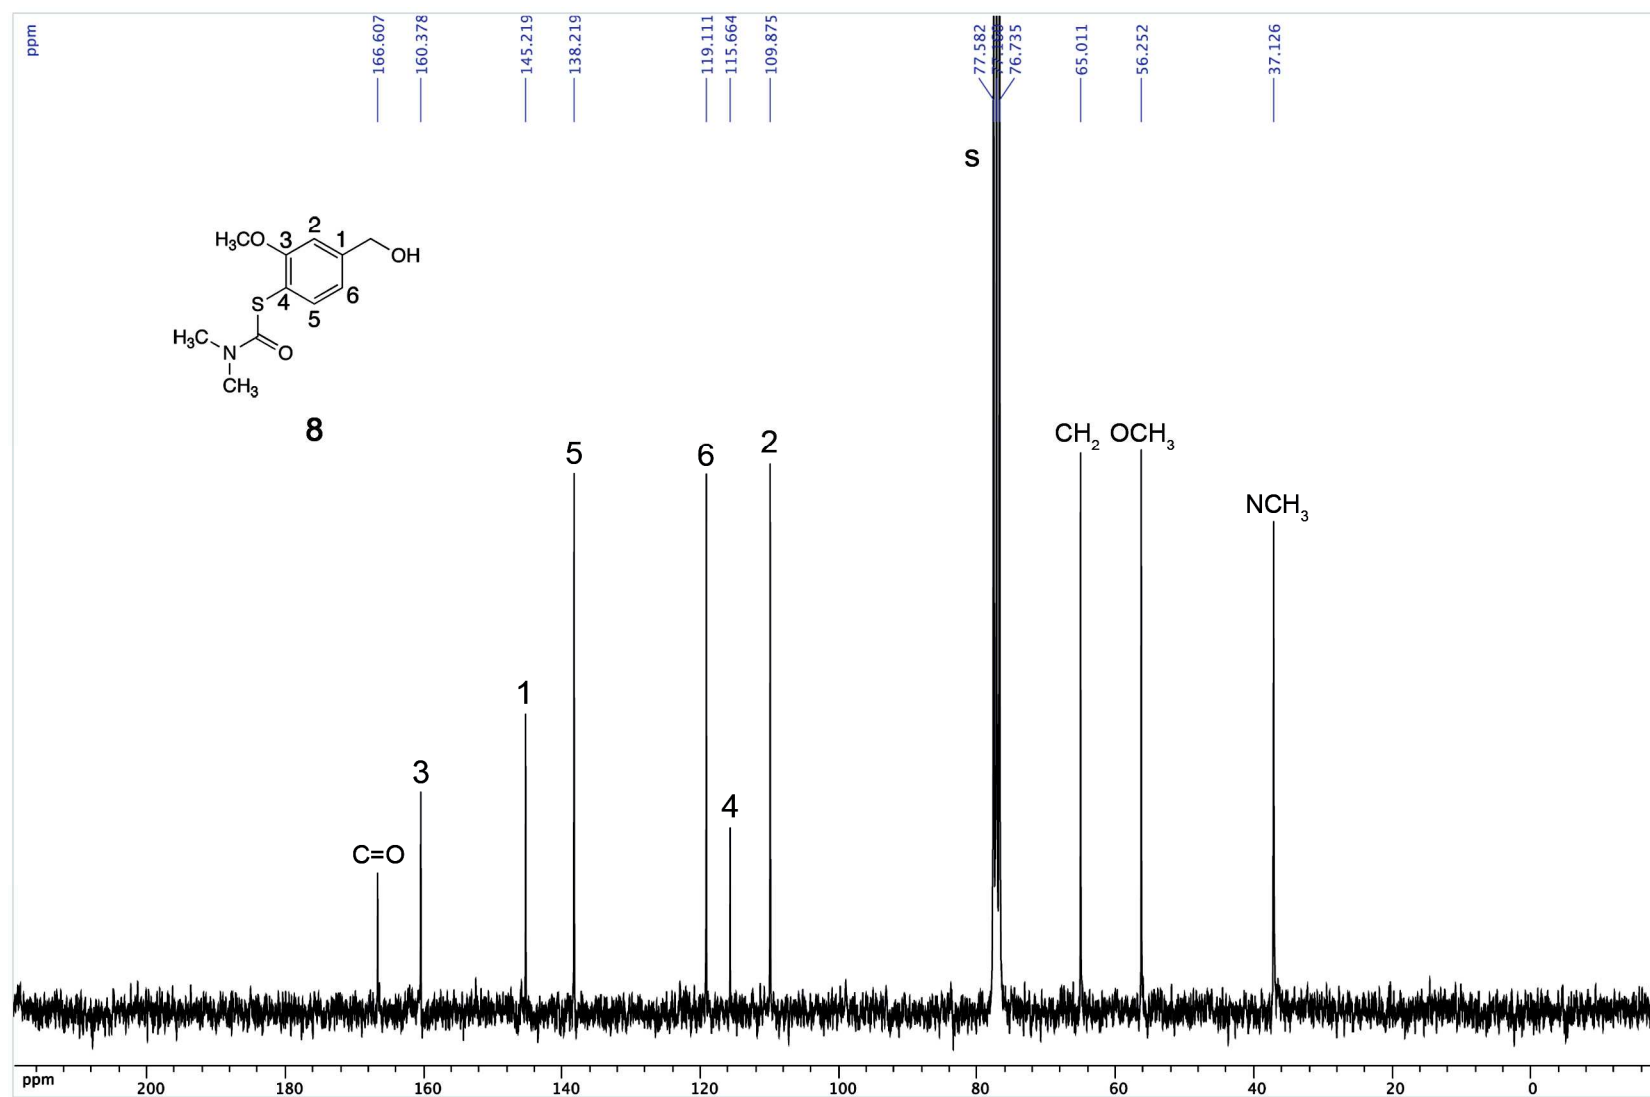

**Figure S 20:** <sup>13</sup>C NMR spectrum of compound **8** (75 MHz, CDCl<sub>3</sub>).

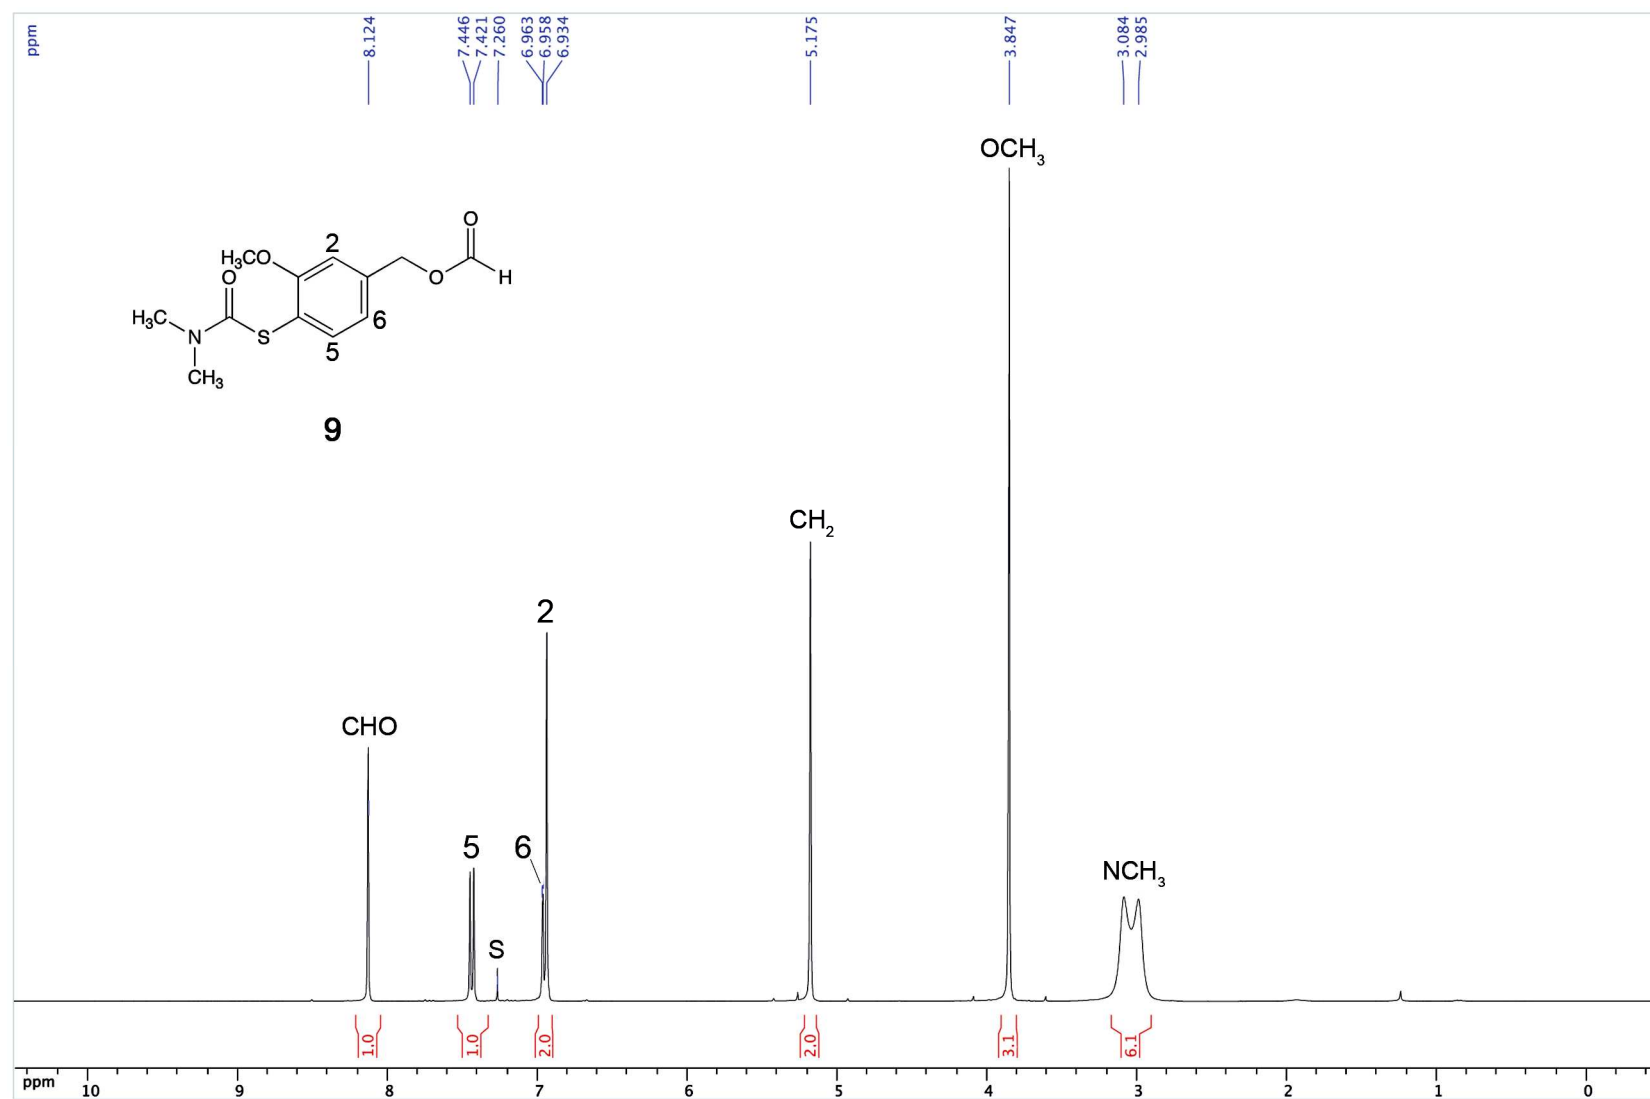

**Figure S 21:** <sup>1</sup>H NMR spectrum of compound **9** (300 MHz, CDCl<sub>3</sub>).



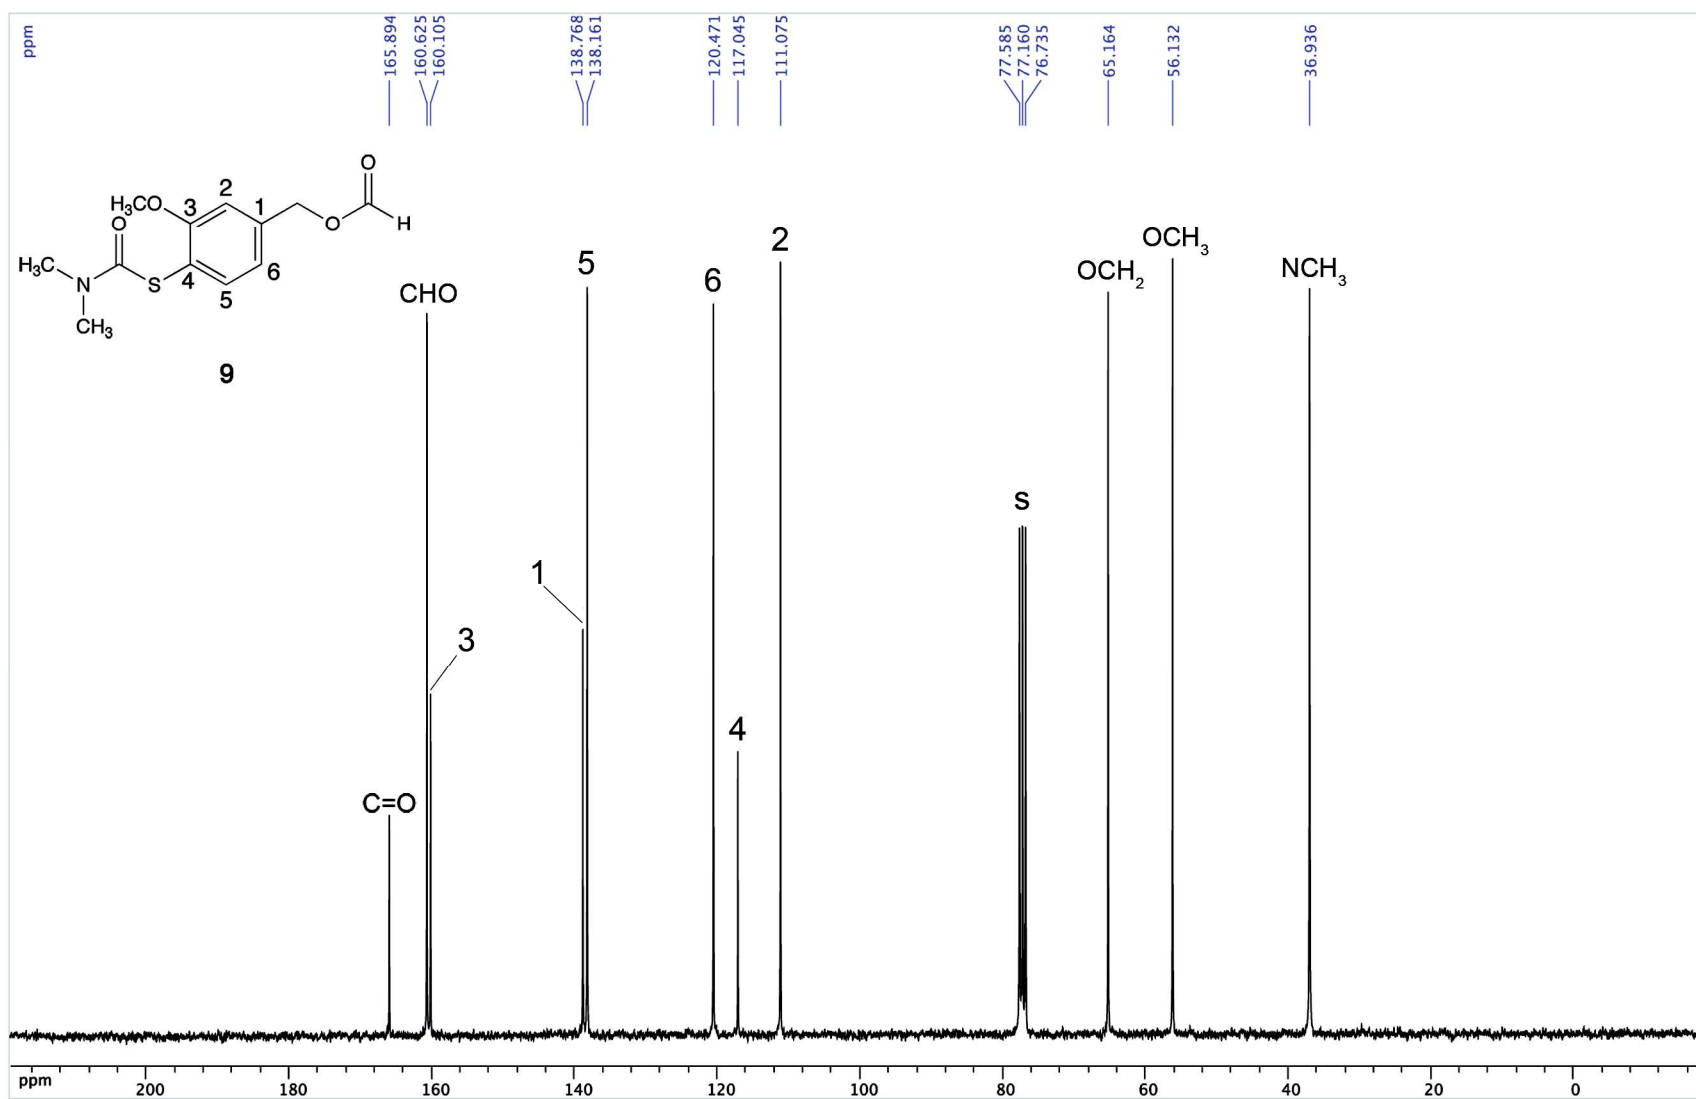

**Figure S 22:** <sup>13</sup>C NMR spectrum of compound **9** (75 MHz, CDCl<sub>3</sub>).

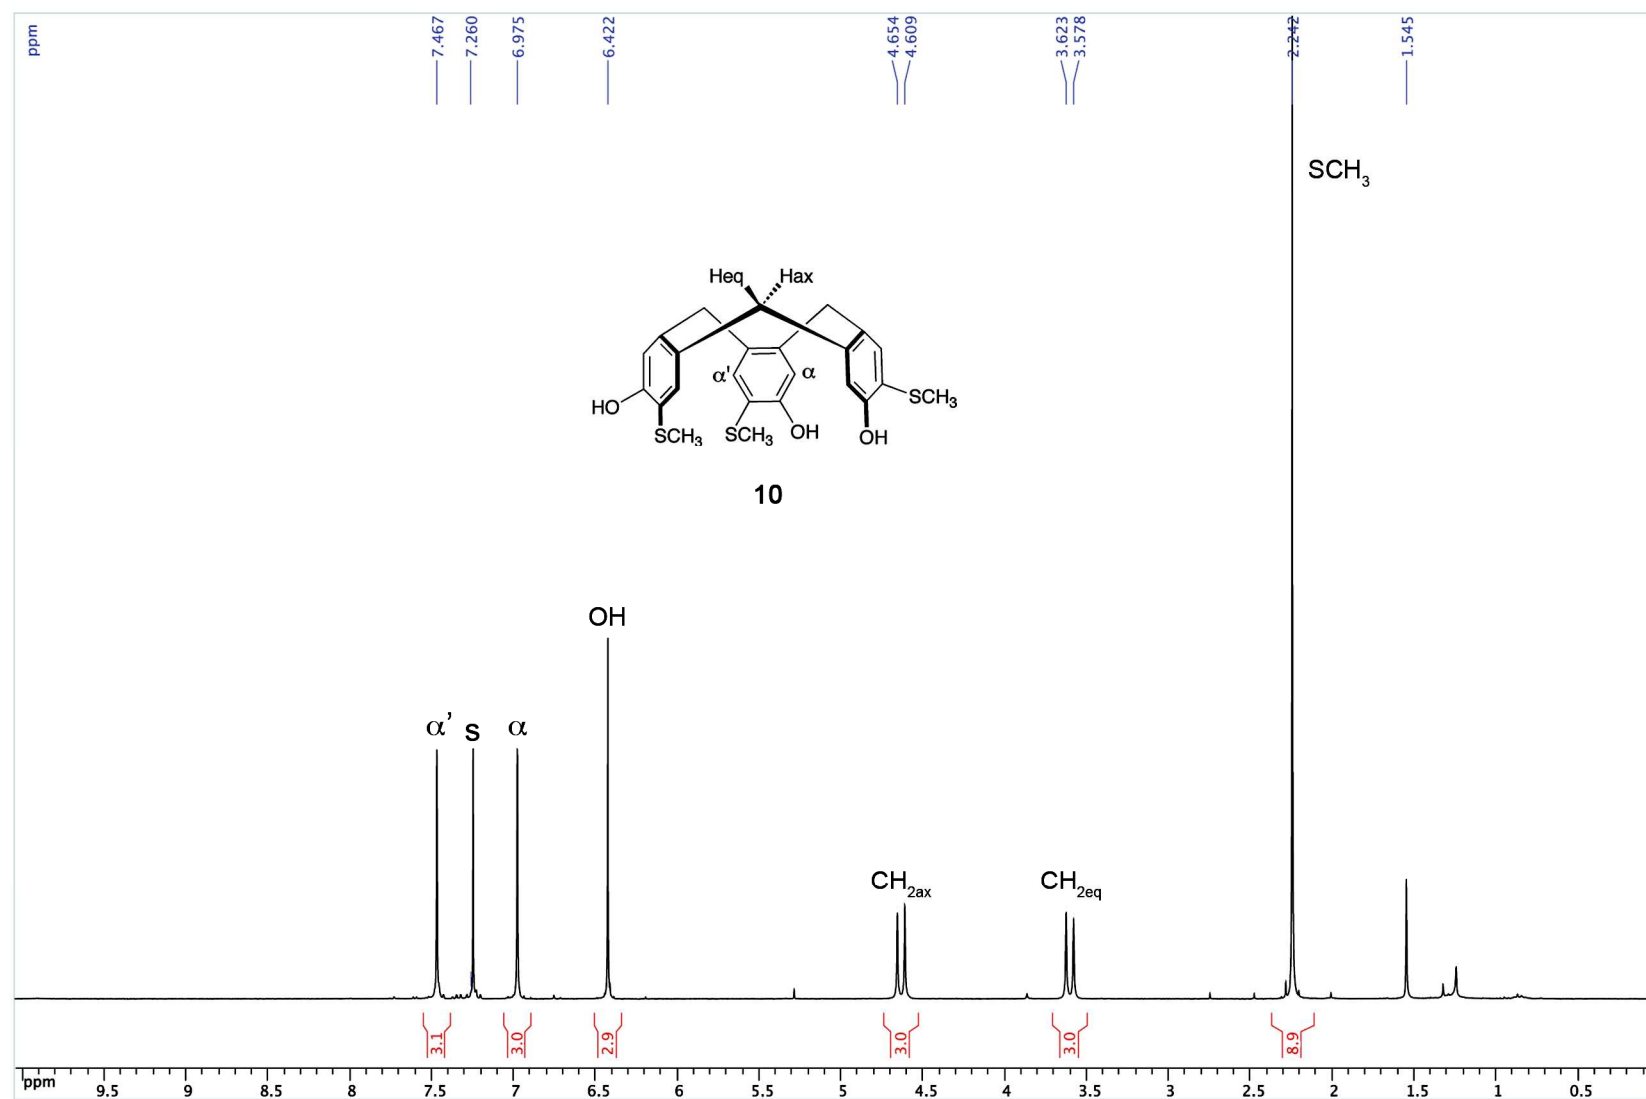

**Figure S 23:** <sup>1</sup>H NMR spectrum of compound **10** (300 MHz, CDCl<sub>3</sub>).

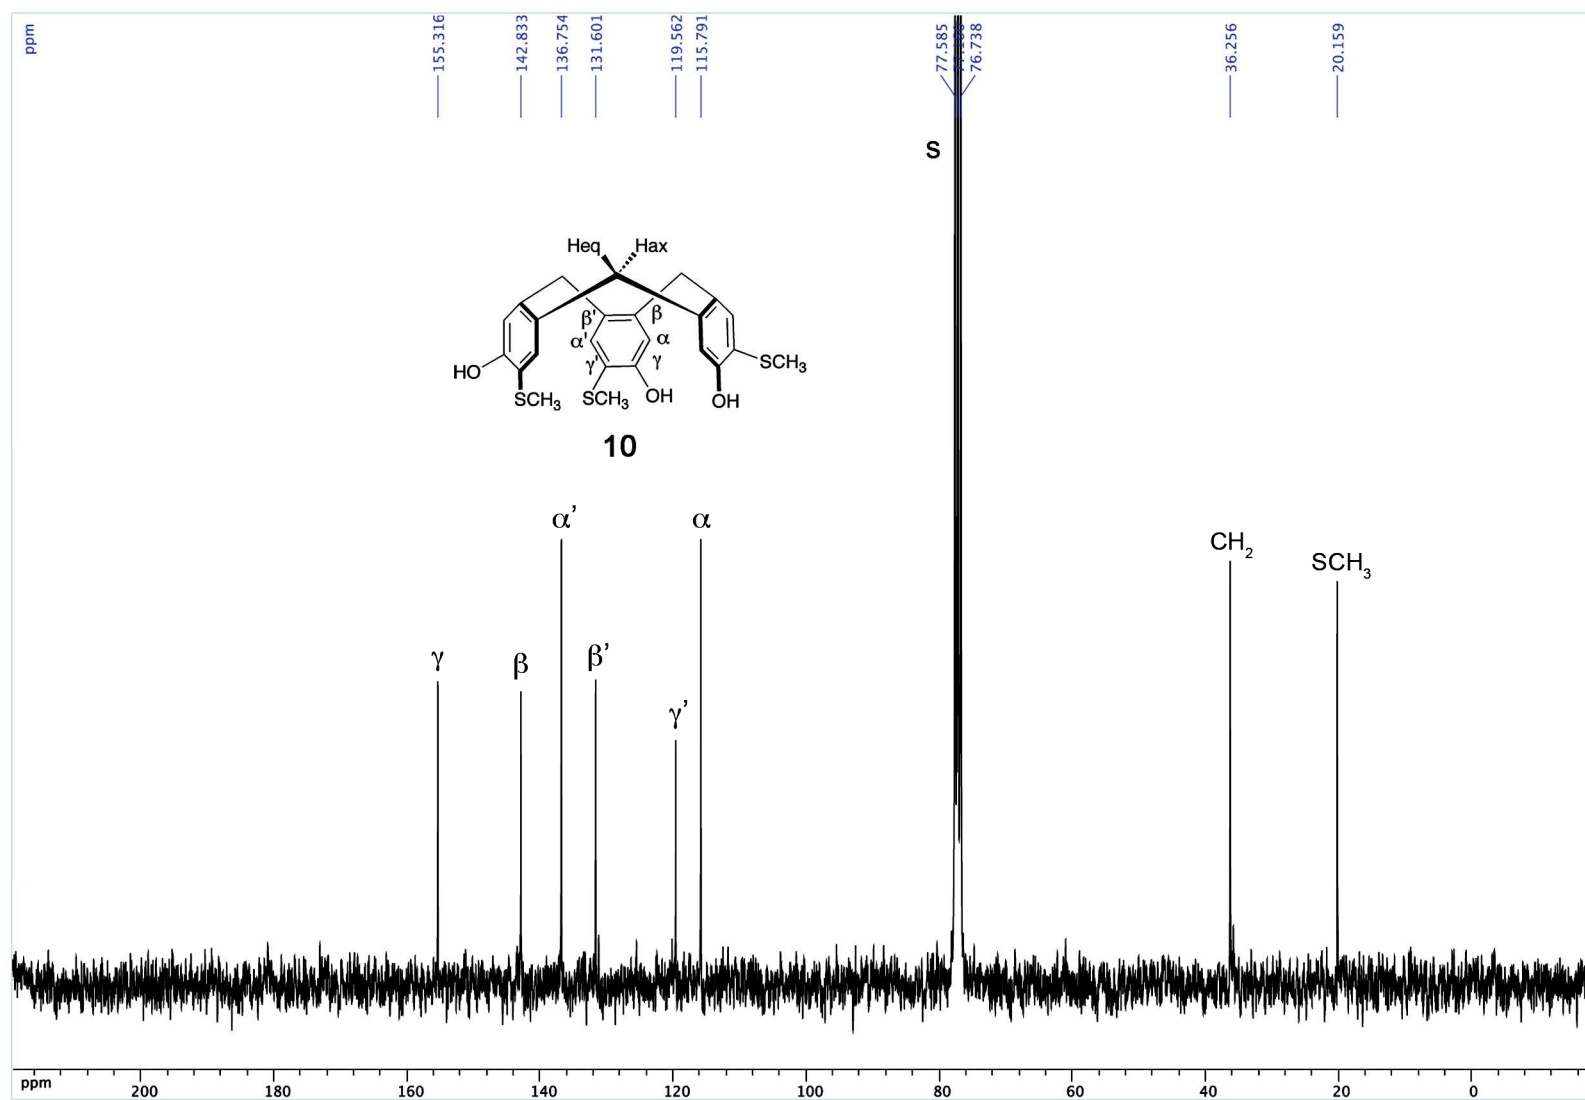

**Figure S 24:** <sup>13</sup>C NMR spectrum of compound **10** (75 MHz, CDCl<sub>3</sub>).

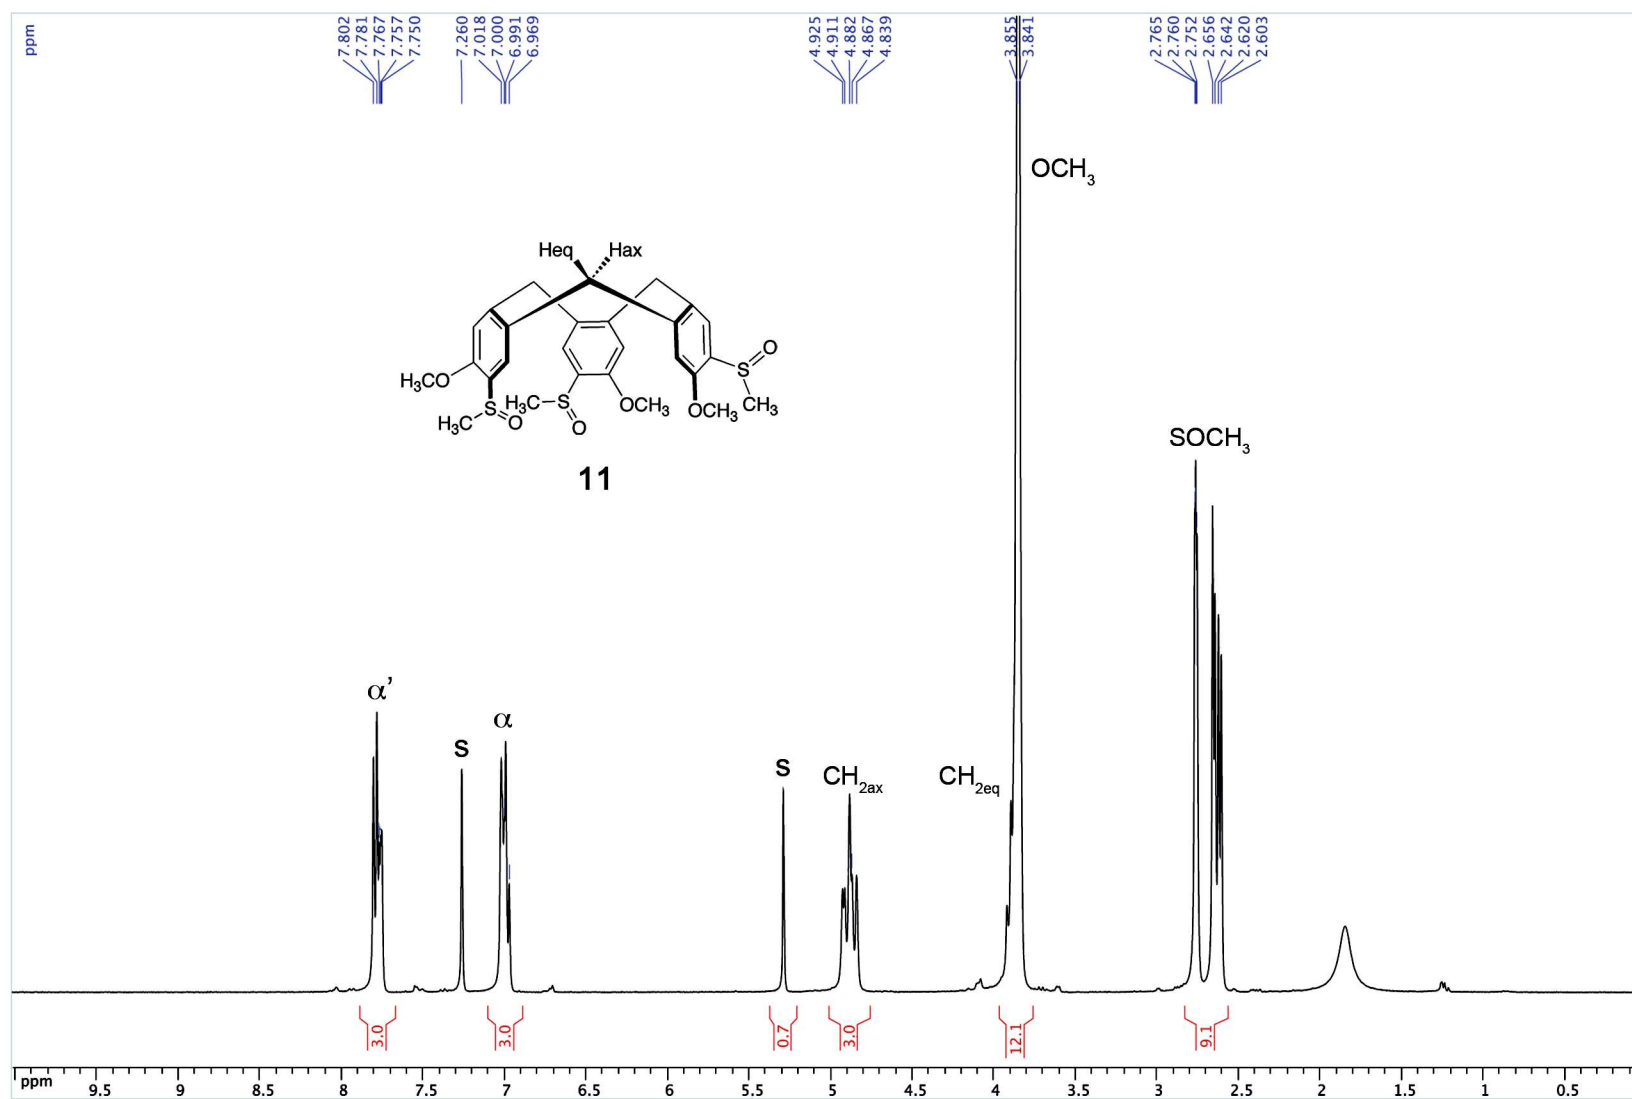

**Figure S 25:**  $^1\text{H}$  NMR spectrum of compound **11** (300 MHz,  $\text{CDCl}_3$ ).

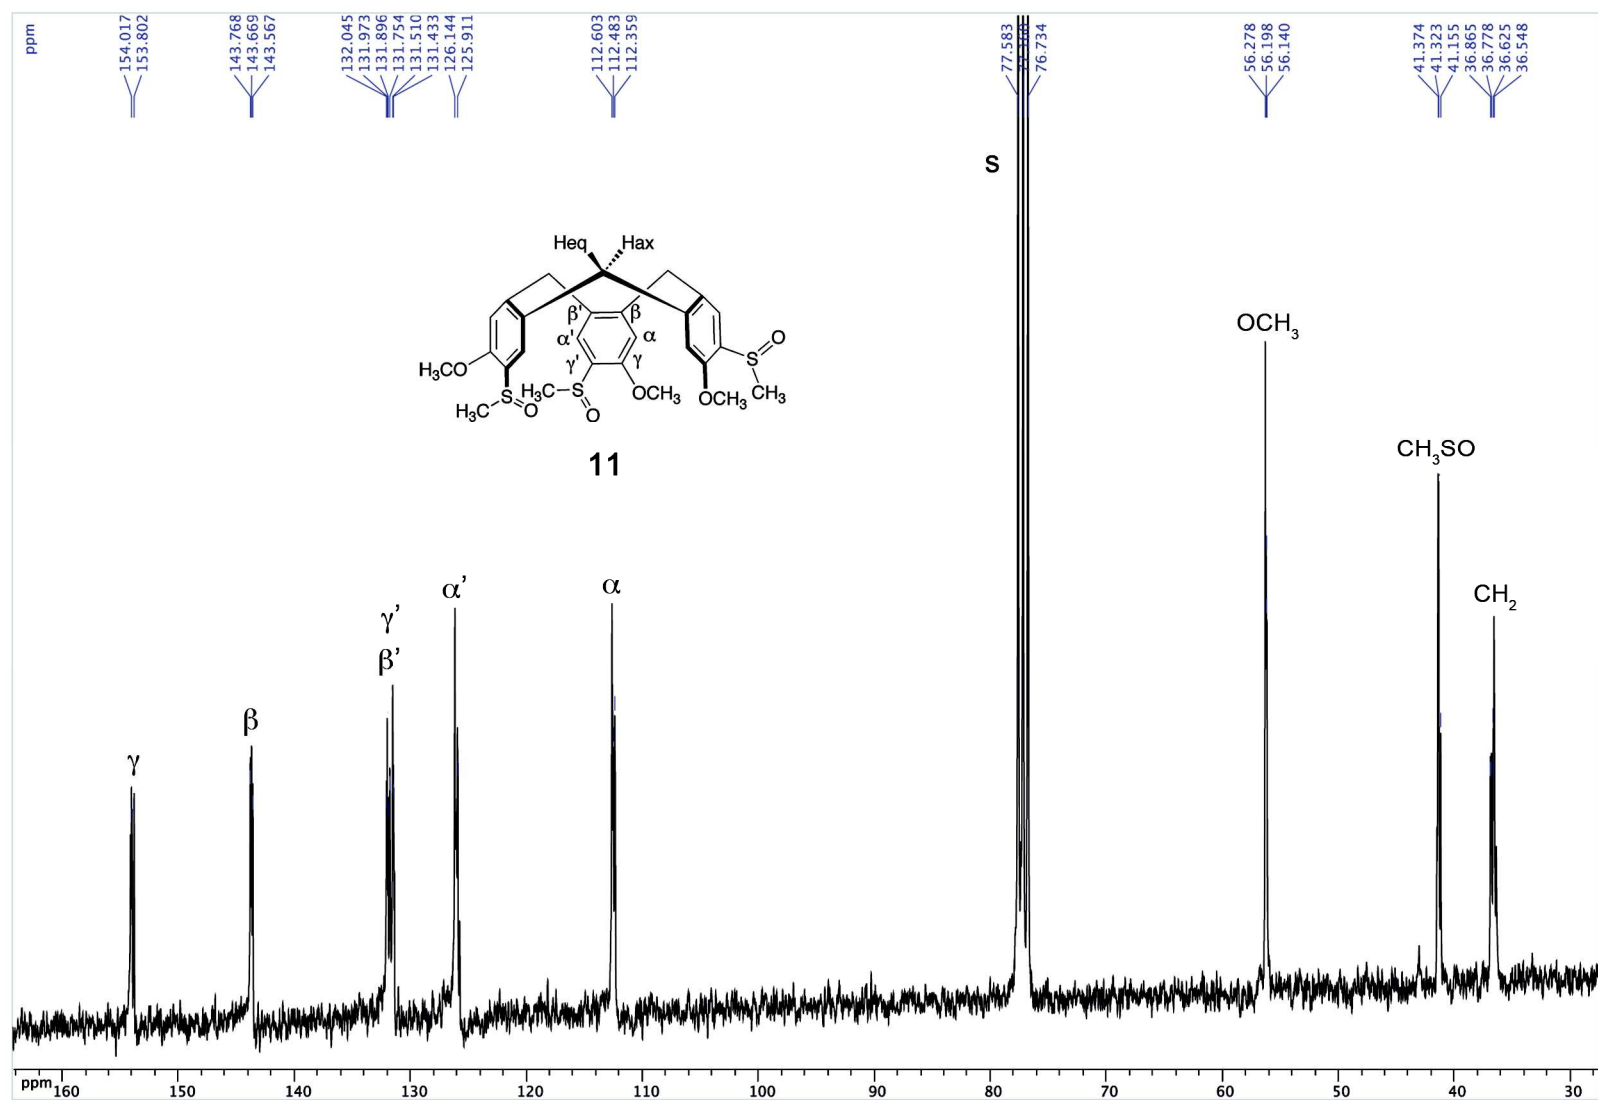

**Figure S 26:** <sup>13</sup>C NMR spectrum of compound **11** (75 MHz, CDCl<sub>3</sub>).

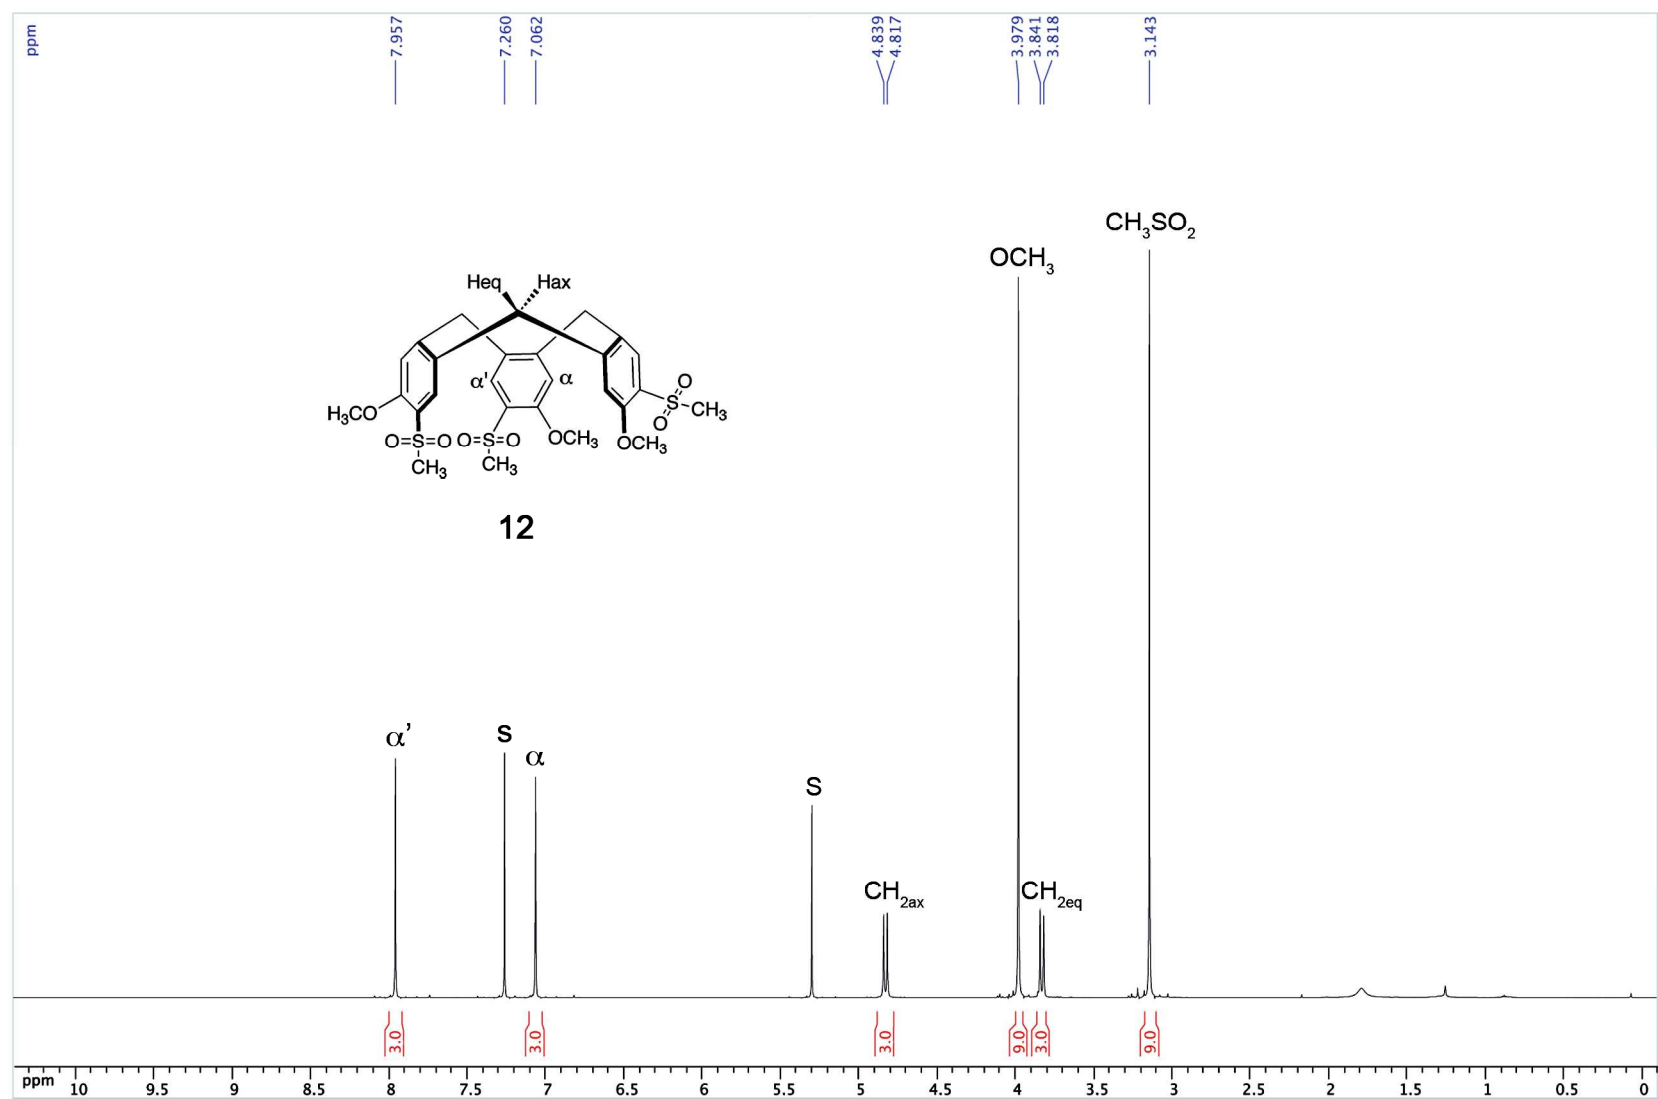

**Figure S 27:**  $^1\text{H}$  NMR spectrum of compound **12** (300 MHz,  $\text{CDCl}_3$ ).

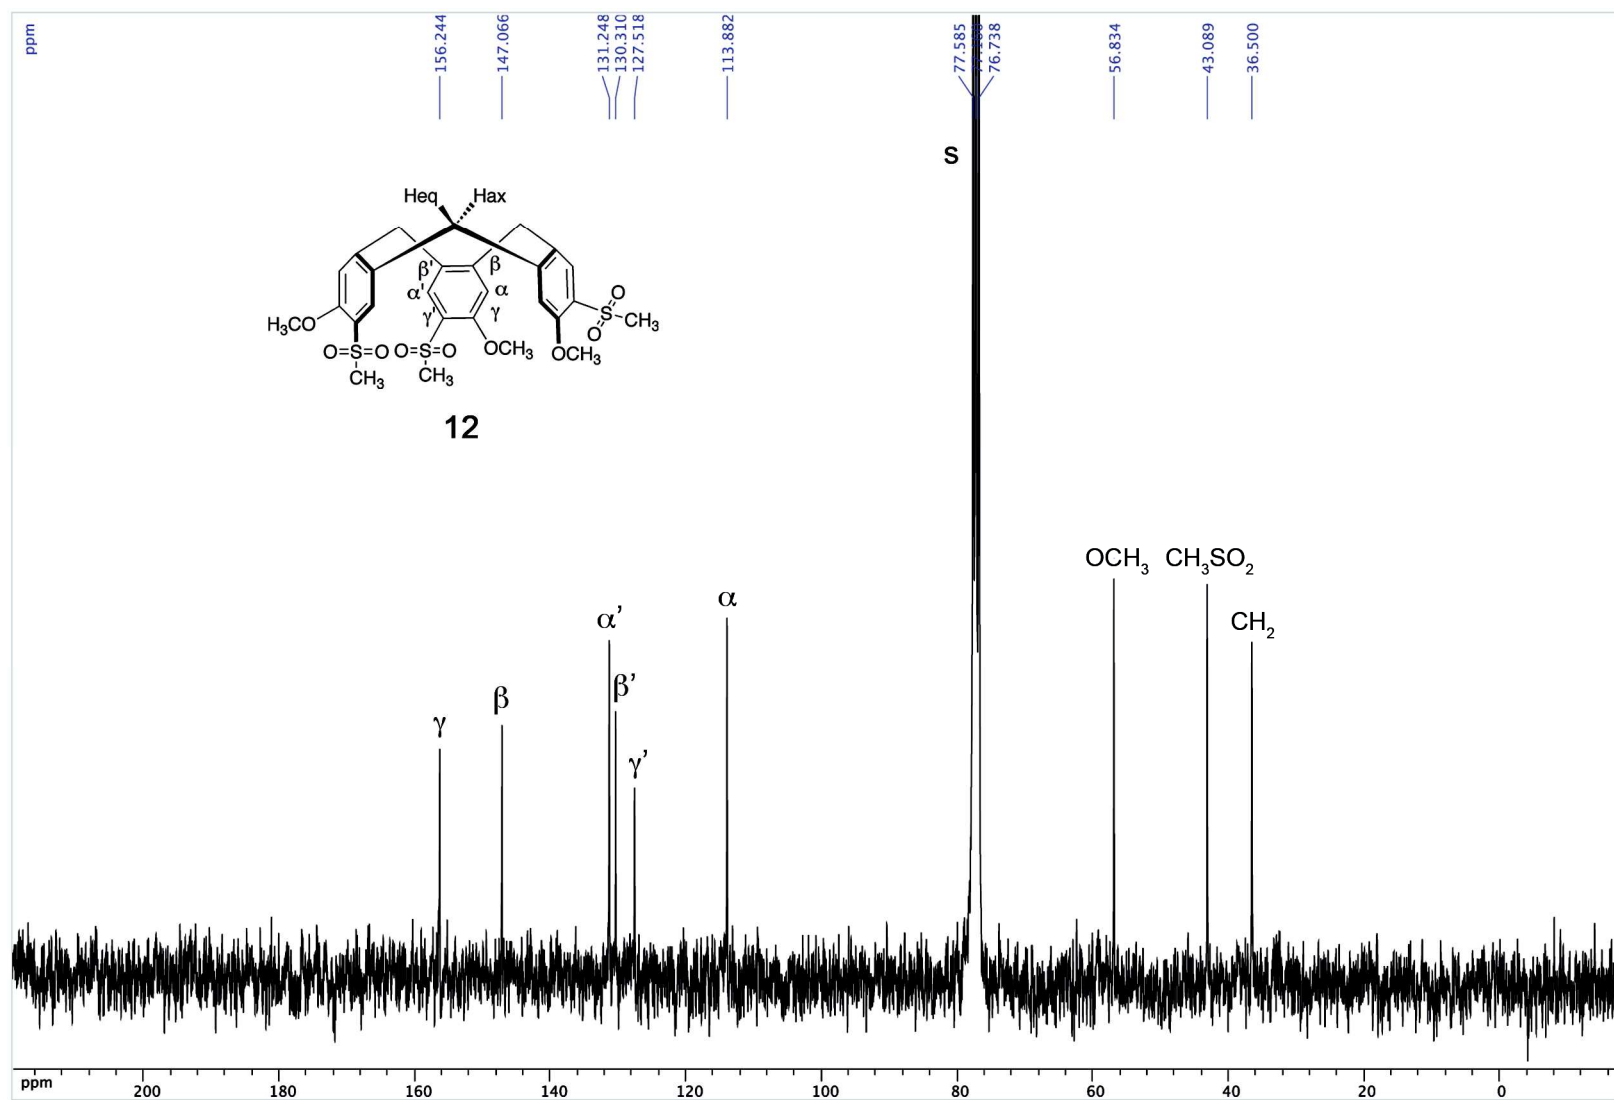

**Figure S 28:** <sup>13</sup>C NMR spectrum of compound **12** (75 MHz, CDCl<sub>3</sub>).
